# FRONT MATTER

**Title:** Unbiased lexicometry analyses illuminate plague dynamics during the second pandemic.

**Short Title:** Informatic analysis of plague-related texts.

## Authors

Rémi Barbieri<sup>1,2,3†</sup>, Riccardo Nodari<sup>4†</sup>, Michel Signoli<sup>2</sup>, Sara Epis<sup>4</sup>, Didier Raoult<sup>1,3</sup>,  
Michel Drancourt<sup>1,3\*</sup>

## Affiliations

<sup>1</sup> Aix Marseille Univ., IRD, MEPHI, IHU Méditerranée Infection, Marseille, 13005, France.

<sup>2</sup> UMR 7268, Anthropologie bioculturelle, Droit, Ethique et Santé, Aix Marseille Univ, 11 CNRS, EFS, ADES, Marseille, 13344, France.

<sup>3</sup> IHU Méditerranée Infection, Marseille, 13005, France.

<sup>4</sup> Department of Biosciences and Pediatric Clinical Research Center “Romeo and Enrica Invernizzi”, University of Milan, Milan, 20133, Italy.

† These authors contributed equally to this work

\* Corresponding author: [michel.drancourt@univ-amu.fr](mailto:michel.drancourt@univ-amu.fr)

IHU – Méditerranée Infection, 19-21 Boulevard Jean Moulin, 13005 Marseille.  
Phone number: + 33 (0)4 13 73 20 01

## Abstract

Knowledge of the second plague pandemic that swept over Europe during the 14th-19th centuries, mainly relies on the exegesis of contemporary texts, prone to interpretive bias. Leveraging bioinformatic tools routinely used in biology, we here developed a quantitative lexicography of 32 texts describing two major plague outbreaks using contemporary plague-unrelated texts as negative controls. Nested, network and category analyses of a 207-word pan-lexicome over-represented in plague-related texts, indicated that “buboes” and “carbuncles” words were significantly associated with plague, signaling ectoparasite-borne plague. Moreover, plague-related words were associated with the words “merchandise”, “movable”, “tatters”, “bed” and “clothes”, while no association was found with rats and fleas. These results support the hypothesis that during the second plague pandemic, human ectoparasites were the major drivers of plague. Analyzing ancient texts using here reported method would certify plague-related historical records and indicate particularities of each plague outbreak, including sources of the causative *Yersinia pestis*.

## MAIN TEXT

### Introduction

Plague, a deadly zoonosis caused by the bacterium *Yersinia pestis* [1], has been incontrovertibly identified via paleomicrobiological methods in numerous historically described burial sites in Europe, ending decades-long controversies regarding the etiology of the so-called “Black Death” episode (1346-1353) and related episodes forming the 1346-18<sup>th</sup> century second plague pandemic [2–7]. Ancient texts related to these plague episodes reported massive mortality [8–11], with an estimated ~ 30 million deaths attributed solely to the “Black Death” episode (4, 11). Such figures have never again been observed during the plague outbreaks forming the 1894-current third plague pandemic [12,13], leaving unknown the forces that shaped plague dynamics during the second plague pandemic.

Indeed, the sources and routes of the spread of *Y. pestis* in medieval European populations remain speculative, deriving as they do from the mathematical modeling of ancient plague episodes [13], which obviously cannot be verified, and from cumulative observations made during the third pandemic, which may not be applicable to the second pandemic [14,15]. As an example, transmission of *Y. pestis* by rats and their flea ectoparasites or by the respiratory route, well described during the limited 20<sup>th</sup> century plague outbreaks [13,16,17], may not have been sufficient to fuel the massive medieval mortality, pointing to the complementary role of human lice (*Pediculus humanus humanus*) and anthropophilic fleas (*Pulex irritans*) [13,18,19]. Accordingly, the relative contributions of rats, other mammals and animal and human ectoparasites to the dynamics of the second plague pandemic are poorly documented. Historical texts describing ancient plague outbreaks have been studied for more than one century [20–22], yet measuring the relative contributions of each factor during the second plague pandemic remains challenging in the absence of any quantitative analysis involving comparison with negative control texts, perpetuating the controversies regarding the dynamics of historical plague outbreaks [13,18,23,24].

To resolve some of these controversies, we designed a purposely naïve unbiased method for the automatic analysis of ancient plague texts derived from a method routinely used in biology to measure the relative expression of genes in a set of biological samples including negative control samples [25]. This model uses ancient plague-related text sets and negative control texts to measure the differential expression of plague-related words, creating a core-lexicome (core signature) of ancient plague and an accessory-lexicome specific to each ancient plague outbreak and opening an avenue for studying the pan-lexicome of plague. The method described here was developed based on positive control texts describing the paleomicrobiologically confirmed Great Plague that affected the city of Marseille and Provence at large in 1720-1722 [2,6,26,27] and was subsequently applied to texts describing the historical plague of 1629-1631, which ravaged Northern Italy, an episode still in need of paleomicrobiological confirmation [27,28].

We cataloged words significantly associated with plague in these records and derived original knowledge regarding the sources and transmission of *Y. pestis* during two outbreaks attributed to the second pandemic in Europe.

83  
84  
85  
86  
87  
88  
89  
90  
91  
92  
93  
94  
95  
96  
97  
98  
99  
100  
101  
102  
103  
104  
105  
106  
107  
108  
109  
110  
111  
112  
113  
114  
115  
116  
117  
118  
119  
120  
121  
122  
123  
124  
125  
126  
127  
128  
129

# **Results**

## **Building the Marseille word database**

A word repertoire drew from 16 historical French texts describing the microbiologically documented 1720-1722 Great Plague of Marseille, France [2,6,26], and from 11 contemporary plague-unrelated French texts dating from the same historical period (Data file S1 and S2), after verification that the maximum Jaccard index between two texts was 0.08 using the “Jaccard” package in Rstudio (fig. S1A). This ensured that the 27 texts were original enough (without significant plagiarism) to be used as independent samples. This repertoire comprised a total of 2,049,566 words directly imported (without any modification) from Google Books into Rstudio, including 473,681 words (23.1%) poorly digitized due to damage resulting from preservation conditions and that therefore could not be included in further analysis. Then, 1,575,885 words (76.9%) representative of 10,315 unique words were cleaned by removing noncharacter letters and spaces, replacing ancient characters with homologous characters in the contemporary alphabet (i.e., the “long S” was replaced with “s”), filtering (with a French glossary of 336,631 words, conjugated verbs and proper nouns) and deleting words with fewer than five occurrences in all 27 texts (Complete script present as Supplementary Text 1). Altogether, the final 1,575,885-word database comprised 904,005 words from the 16 plague-related texts and 671,880 words from the 11 negative control texts.

## **Analyzing the Marseille word database**

This word database was used to compare the relative expression of words in the 16 plague-related texts and the 11 negative control texts (Fig. 2A). This comparison was performed by leveraging informatics methods and employing cut-off values commonly used in the field of transcriptomics (the analysis of RNA sequences, i.e., significant letter series using the universal biological code, in biological samples) (Fig. 1). Accordingly, using the DESeq2 package originally developed to identify dysregulated genes in transcriptome analyses, we generated a list of 70 words ( $\log_2\text{foldchange} > 0$  and  $P \text{ adjust} \leq 0.05$ ) (0.0007%), being overrepresented in plague-related texts compared to control texts as presented in the WordCloud (Fig. 2; Table S1; Data file S3). Two words are represented twice such as “Contagious” and “Infected”. Our results confirmed the significant report of the two plague signs, namely, “bubo” ( $P \text{ adjust} = 5\text{e-}07$ ) and “carbuncle” ( $P \text{ adjust} = 0.003$ ). Notably, these two signs have been continuously described, by Procopius in Antiquity [29], Guy de Chauliac in medieval times [30] and Yersin and Simond at the beginning of the third, current plague pandemic [31,32]. The significant detection of these two words, constituting internal positive controls, validated our method and allowed us to consider enriched words as significantly associated with plague. Notably, the words “rats” and “fleas” appeared only 11 and 5 times in plague-related texts versus 5 and 3 times in negative control texts, respectively; the differences were not significant. Further careful examination revealed that the word “rat” was misleading in 5 cases, resulting from the abbreviation of the word “magistrate”; ultimately, there were 6 true occurrences in one text reporting dead rats in the streets and rats fleeing houses where plague was declared, but the author spoke of plague in general, and in any case, he does not mention rats during the Marseille plague [33]. Likewise, the word “flea” was mainly used to describe spots on the dura, observed during autopsy, that looked “like flea bites” and once to describe spots

on the belly of a plague-patient as being “like flea bites”. In only one case, “flea” unambiguously referred to the ectoparasite, but in an out-of-plague context.

## Categorizing the Marseille word database

By analogy with bioinformatics, where clusters of orthologous genes (COGs) are defined as functional categories [34], the 70 plague words were classified into 19 categories of words, each category comprising words related to the same function in the plague-related texts (Data file S4). The category “Other” was the most abundant, comprising 15/70 (21%) unclassified words, followed by the categories “Consequence” (10/70 words, 14%), “Public Response” (8/70 words, 11%) and “Nature of plague” (7/70 words, 10%). Some words, such as “police”, “physician”, “hospital” and “infirmary” were classified into two different categories: “Prevention” and “Public Response”. Indeed, it appeared that these professions or places already existing before the plague surge were strengthened due to the catastrophic situation because of the construction of new infirmaries and hospitals and the increase in the number of doctors and police personnel. Faced with the assignation of some words to several categories, we specifically consolidated the category “Sources” by analyzing every sentence in which each word of this category was used to determine the number of its occurrence as a *bona fide* plague source. This analysis indicated that the word “movable” was used in 194/207 (94%) occurrences as a plague source; “tatters” was used in 196/225 (87%) occurrences as a plague source; “clothes” was used in 128/153 (83%) occurrences as a plague source; and “merchandise” was used in 561/810 (69%) occurrences as a plague source (Table 1).

## Marseille word database: nested and network analyses

Nested analysis was used to contextualize the 70 words overrepresented in the plague-related texts by extracting the 25 words downward and the 25 words upward of each of these overrepresented words and then testing the significance of each; WordClouds for each overrepresented word was generated using a  $P \text{ adj} < 0.001$  (Data file S5; fig. S3). As an illustration of this nested analysis representation, the word “merchandise” (Fig. 3) in the category “Source” was significantly associated with “Levant”, “smugglers”, “June”, “fur”, “ship”, “clear”, “unseating”, “exposed”, “purged”, “tatters”, “transport”, “porter” and “Jarre” (the name of the quarantine island in the Marseille gulf) ( $P \text{ adj} < 0.001$ ) (Fig. 3). Likewise, in the symptoms category, the word “carbuncles” (the gangrenous lesions consecutive to the blisters corresponding to a microbe’s gateway through the skin) [32] had 625 occurrences and was significantly associated with “groin”, “parotid”, “arms”, “leg” and “thigh”, all words indicative of the topography of the lesions ( $P \text{ adj} < 0.001$ ). The word “bubo” (the lymph node proximal to the inoculation site (blister or carbuncle)) [32,35] had 948 occurrences and was significantly associated with “groin”, “armpit”, “arm”, “throat”, “parotid”, “ear”, “maxillary”, “jugular” and “thigh” ( $P \text{ adj} < 0.001$ ) (Fig. 3), all words designating localizations unsurprisingly similar to those associated with “carbuncles”, with 95% similarity. Concerning plague sources, the words “tatters”, “movable” ( $P \text{ adj} < 0.001$ ), “cloth” and “air” ( $P \text{ adj} < 0.005$ ) were found to be linked with “infected” and multiple other plague-related words (Fig. 4). The word “tatters” was associated to infection (e.g. “kill”, “corrupt”, “communicated”, “filth”, “contaminates”, “miasms”, “infect”, “infection”  $P \text{ adj} < 0.001$ ), disinfection-related words (e.g. “purge”, “burn”, “aromatic”, “confiscation”, “punished”  $P \text{ adj} < 0.001$ ), and also interesting words

related to the dissemination of the plague and its origin (e.g. “smugglers”, “Turkish”, “Tripoli”  $P_{adj} < 0.001$ ). The word “movable” was linked to words from the same lexical field as “tatters” (e.g. “tatters”, “cloth”, “clothes”  $P_{adj} < 0.001$ ). It was also associated with infection (e.g. “dangerous”, “infection”  $P_{adj} < 0.001$ ) and disinfection-related words (e.g. “burn”, “purge”, “destroyed”, “disinfection”, “perfume”, “purify”, “confiscation”  $P_{adj} < 0.001$ ). All these associations suggest that contemporaries considered tatters, clothes, and movable as plague sources that communicated plague across the city. Likewise, the word “merchandise” was linked to multiple disinfection related words (e.g. “purge”, “quarantine”  $P_{adj} < 0.001$ ). The word “air” was dichotomously associated with contagion (e.g. “bad”, “corrupt”  $P_{adj} < 0.001$ , “infected” and “poisonous”  $P_{adj} < 0.005$ ) and with purification (e.g. “purify”, “pure”  $P_{adj} < 0.001$ ). In Fig. 4 it can be clearly seen that the word “infected” is linked with the words “tatter”, “cloth”, “movable”, “air” and “merchandise” ( $P_{adj} < 0.01$ ). Other networks for potential sources of plague and the relation with other words are reported as fig. S5 and S6.

## Documenting plague in Northern Italy

We then processed 16 historical texts describing an epidemic outbreak in 1629-1631 in Northern Italy (Data file S6), which was never microbiologically confirmed as plague [28]. Twenty Italian texts from the same historical period were used as negative control texts (Data file S7) (Jaccard index between two texts  $< 0.03$ ) (fig. S1B). The repertoire of words included 1,574,910, of which a final word database of 1,063,483 words total, including 451,856 words from the plague-related texts and 611,627 words from the negative control texts. Using the DESeq2 package, we obtained a list of 147 overrepresented words (0.03%) ( $P$  adjust value  $\leq 0.05$  and  $\log_2\text{foldchange} > 0$ ) (Fig. 5) (Table S2; fig. S2B; Data file S8). Seven words are represented twice such as “contagion”, “could”, “did”, “infected”, “our” and “stuff” while “were” is represented three times. These 147 words were then classified into the same categories used for the Marseille text analysis (Data file S4), and the words in the “source” category were consolidated as explained previously (Table 1). In particular the Italian words “roba” and “robba”, which have been translated into the English word “stuff” and are used in a general way to indicate multiple things, such as movable, merchandise, food and especially clothes (Supplementary Text 2), were present more than 400 times in plague-related texts and in 90% of the cases the term was considered by the author as a plague source. Interestingly, the Italian word for “rat” was present only four times in the plague-related texts: it appeared twice in a figurative sense, once as a general premonition of plague (“If the underground animals flee their rooms, they come upon the earth, unable to live in the extreme putrefaction of their mother, which are worms, snakes, toads, rats, and being on the ground they die, then they are the cause of infection”) [36] and once in a statement that rats, together with dogs, cats, hens and doves, should be killed as a precaution to protect houses from the disease [36].

Nested analysis on Italian overrepresented words indicated that words such as “clothes”, “beds”, “air” and “rooms” were directly linked to infection, disinfection and danger-related words, indicating clear attention to them as potential plague sources (Data file S9; fig. S4). In particular, the word “bed” was linked to infection (“infected”, “contagion”, “pestiferous”  $P_{adj} < 0.01$ ), disinfection (“purge”, “perfume”, “air”, “boil”  $P_{adj} < 0.01$ ), and “caution” ( $P_{adj} < 0.01$ ). Similarly, the word “cloth” was found to be associated with plague-related words, such as “infected” ( $P_{adj} < 0.01$ ), “caution” ( $P_{adj} < 0.001$ ), and



“poison” ( $P_{adj} < 0.01$ ). The word “poison” was also associated with “clothes” ( $P_{adj} < 0.01$ ). Moreover, the word “air” was linked to “infected” ( $P_{adj} < 0.001$ ), “bed” ( $P_{adj} < 0.001$ ), and “pestiferous” ( $P_{adj} < 0.01$ ).

## Plague pan-, core- and accessory- lexicomes

To define the plague pan-, core- and accessory- lexicomes (the complete collection of words associated with plague, the plague words in common between the French and Italian lexicomes, and the plague words specific to each episode, respectively), all the French and Italian words were translated into English using the translation function in Microsoft® Word. Misleading translations of four words (three from French texts and 1 from Italian texts) resulted either from a truncated word (e.g., “conta” for “contamination”) or from an isolated letter (e.g., “o”), so that DESeq2 analysis incorporated a total of 68 unique words for Marseille and more than twice the number (139 unique words) for Northern Italy. This difference in the richness of the repertoire between the two datasets and the stronger association between words obtained from the nested analysis for French text respect to the Italian ones (Datasets S5 and S9), could be explained by the fact that the Italian texts in the Northern Italy dataset were largely written by nonmedical professionals such as religious figures, historians and economists (Dataset S6), while the French texts in the Marseille dataset were all written by doctors (Dataset S1). Additionally, the Italian texts described an epidemic covering multiple cities in multiple small countries in Northern Italy, while the French texts covered a much more geographically limited region. The plague pan-lexicome was composed of 10,743 words and included a core-lexicome of 2,645 words: 4,063 words are specific to Marseille’s plague and 4,035 to the Italian plague. Regarding overrepresented unique words, there were 207 in the pan-lexicome (Fig. 6); the core-lexicome had 17 unique words: 51 specifics to Marseille and 122 specifics to Northern Italy constituted the two accessory-lexicomes. Words significantly enriched in the Marseille plague texts had a significant probability of also being enriched in the texts related to the 1629-1631 Italian plague compared to control texts (Fisher’s exact test performed with two conditions,  $P_{val} < 0.001^{***}$ ;  $P_{val} < 0.00001^{****}$ ). The French and Italian datasets were then merged graphically to create networks of common and unique words. Words of interest present in both datasets were compared and placed together to form a network evidencing nested words that were unique or common to both datasets ( $P_{adj} < 0.01$ ). The network representing the significant symptoms of plague (bubo and carbuncle) showed overlap between the Marseille and Northern Italy datasets corresponding to the most common locations for buboes and carbuncles (“groin”, “armpit”, “throat”, “parotid”, “leg”, and “arm”) (Fig. 7). Interestingly, three words “air”, “bed” and “cloth” from the category “Sources” overlapped in the network for “infected” (Fig. 4). No other potential plague sources were observed in common between the Marseille and Northern Italy datasets.

## Discussion

Updated lexicographic analyses of ancient texts describing deadly outbreaks proved efficient for identifying them as plague-describing texts and provided valuable information regarding plague dynamics during the second pandemic.

We developed and used a method derived from automatic bioinformatics to obtain quantitative information from ancient texts. Our data, coupled with paleomicrobiological analysis [2,6,26], confirm that these ancient texts speak of a plague caused by *Y. pestis*, as revealed by the significant presence of the words “buboes” and “carbuncles”, the two main symptoms of plague during the second pandemic. These results resolve a years-long debate as to the etiology of plague in historical sources. Indeed, plague was initially interpreted as a hemorrhagic fever [23,37,38] because of the absence of rats and their fleas and because some researchers thought that the term “Black Death” denoting the medieval plague partly reflected the symptoms of the disease. In reality, this term was anachronistic and remains largely metaphorical (reflecting the idea of disaster) [39]. Furthermore, through our analysis, we ascertained that contemporaries of the second plague pandemic did not consider animals as sources of plague. In no case did the historical texts significantly mention animals as a source of plague, disrupting the traditional picture of plague as a primary zoonosis during the second pandemic [18]. In particular, the words “rat” and “fleas”, repeatedly put forward as the source and vector of *Y. pestis* during the second plague pandemic [18,40], did not reach significance and were not enriched in plague-related texts, relativizing the role played by rats and fleas in the transmission of the plague during the second pandemic. Whereas we cannot estimate the predictive negative value of words, such an absence cannot be taken as supporting the prominent role of rats and their ectoparasites during the epidemic episodes.

Instead, contemporaries traced plague outbreaks in Marseille and Northern Italy to imported stuff, a general word encompassing the significantly enriched words “movable”, “tatters”, “clothes”, and “merchandise”; specific references were made to fur imported via the maritime route in Marseille, with a possible unanticipated role of smuggling, and clothes brought by the French and Imperial Allemans soldiers into Northern Italy during the war of Mantua [41–43]. All such clothing was in direct contact with plague-stricken people, and contemporaries insisted on the dangers that these clothes represented in spreading plague. In addition to discussing the Marseille and Northern Italy outbreaks, numerous historical texts reported interhuman transmission of plague through the transportation of movables, merchandise or clothes belonging to plague-stricken persons [44]. Accordingly, the people of those times saw infective potentiality in textiles and other merchandise that came from infected places or with which plague victims had been in contact. Indeed, the trafficking of the clothes of deceased plague victims was a major problem in epidemic periods, given that in preindustrial Europe, wages were so low that buying clothes was a luxury that ordinary people could only afford a few times in their lives [45]. There are multiple direct accounts of episodes in which buying, selling and stealing clothes was reported as having triggered plague in houses, small villages or even cities [41,45,46]. In Milan, the purging and sequestering of all the clothes and movable of plague victims were two primary prophylactic measures. The results herein reported can be put in perspective by those obtained on typhus by the Nobel Prize winner Charles Nicolle: during a 1909 typhus outbreak in Tunis, Nicolle demonstrated for the first time the role of body lice as vectors of infectious diseases in an epidemic context [47]. He found that patients’ lice-infested clothes and their feces infected other people [48,49]. Nicolle noted that bathing and changing clothes stopped contagion [48]. Nicolle’s observations shed light on our results by showing that when an epidemic disease is

transmitted through clothing, it is actually transmitted via human ectoparasites such as body lice, acknowledged vectors of typhus and plague [19,48]. The fact that the vector role of lice was demonstrated in 1909, late in the history of infectious diseases, partially explains why historians neglected body lice in the interhuman transmission of plague, applying the rat-rat flea model, despite all the evidence [13].

In texts from both Marseille and Northern Italy, the words “carbuncle” and “bubo” were significantly enriched. Interestingly, the word “carbuncle”, referring to the skin ulcer following the introduction of *Y. pestis* through skin [32], seems to be very representative of the second plague pandemic, whereas it is rarely described during the third pandemic and no longer reported in contemporary cases of plague. Notably, “buboes” and “carbuncles” were localized all over the body, including the face and the neck (specifically ear, jugular, parotid gland, and maxillary regions), localizations that do not support a role for fleas because rodent fleas are known to bite mainly the lower part of the body (legs and thighs) [Barbieri in press, 2020]; rather, they suggest a role for human ectoparasites, including body lice and human fleas, as vectors of *Y. pestis*, which could explain the rapid spread of the epidemics [19,50–52], as supported by epidemiological [13,17], historical [53] and archaeological studies [18].

In summary, new data generated by a mostly unbiased lexicographic tool provided contrasting knowledge regarding the dynamics of the second plague pandemic, challenging the proposed hypothesis that these episodes resulted from the reactivation of local plague foci [6] by suggesting human ectoparasites as vectors of the deadliest and most widespread plague pandemic in human history.



## Materials and Methods

### Ancient texts

Texts were retrieved from Google Books, Archive.org and Buisante.parisdescartes using the following keyword combinations: plague & Marseille; plague & Italy with specific period ranges such as plague & Marseille & 1720-1820 or plague & Italy & 1629-1680. A total of 32 historical texts describing the 1720-1722 Great Plague of Marseille (16 complete books) and the 1629-1631 Italian plague, also known as the Manzoni plague, after the famous novel written by Alessandro Manzoni in 1827 [54] (13 complete books and 3 book chapters), were retrieved (Data files S1 and S6). Additionally, we retrieved 11 contemporary negative control texts for Marseille and 20 contemporary negative control texts for Northern Italy, all written during the 17<sup>th</sup>-18<sup>th</sup> century and describing surgery, plants, universal history, industry and architecture; these texts were scanned within the framework of the “Google Books” program undertaken by Google and the Archives program (Data files S2 and S7).

### French texts’ disposition

To filter the raw text words (see the historical text mining analysis section), we used a list of French words comprising 336,631 words, conjugated verbs and proper nouns compiled from the Français-Gutenberg Dictionary. The symbol “f” (“long S”, which was used in most languages in Europe until the industrial revolution) was automatically substituted with an “s” only if the new word with an s existed on the list of French words. To standardize the words, plural forms ending with a “s” or “x” were converted to the singular form only if the singular word was present on the list of French words.

### Italian texts’ disposition

Italian texts (plague-related texts and controls) presented ambiguities that could lead to errors in the analysis. Indeed, most Italian books present, at the upper part of each page, the name of the book or chapter. Another problem of Italian books is the repetition of the last word of each page at the beginning of the next one. To avoid problems due to the overrepresentation of some words, these two types of repetitions were manually corrected by removing the name of the book/chapter from each page, together with the last word of each page. As reported above, the symbol “f” (“long S”) was automatically substituted with an “s”. However, we observed that optical character recognition (OCR) programs tend to recognize the “f” symbol as an “f” and not as an “s”. To avoid the loss of the Italian word “peste” (“plague”) due to OCR mistranscription, the word “pefte” (no meaning) was changed to “peste” in all the texts. Accordingly, the only words identified were those present on the list of Italian words (including singular and plural forms, conjugated verbs, proper names, and surnames = 931,657 words). Of these words, 427 (32%) were discarded. Moreover, one-letter words were removed, and singular and plural forms of the words were unified as best as possible into only one word following Italian grammar rules for plural formation (Supplementary Text 3). Plague-related and control text word counts were compared using the DESeq2 R package with default parameters (version 1.22.2).

## Historical text mining analyses

After the raw texts were imported into R (see Supplementary data) in .txt format, all the words were separated and converted to lowercase; accents, empty cells and non-letter characters such as "?", "!", " ", "[.]", "-", "\_", "%", "\$", "€", "#", "\\", "+", "\*", ":", ";", ">", "<", "§", "&", "•", "«", "»", "[{}]", "'''", "\"", and "" were removed. The number of occurrences was computed for each word in the 63 texts. Regarding the plague-related texts, 3,624,476 words were identified, with 2,049,566 words from the French texts and 1,574,910 words from the Italian texts. Given that we were not able to systematically repair ancient mistranscribed words, only words matching those in exhaustive list of French words (including singular and plural forms and all conjugated verbs = 336,631 words) and the exhaustive list of French cities, towns and places or Italian words were considered. Of ~ 3.5 million words, 2,721,742 were conserved (75%), resulting in 25,659 and 44,475 unique words for the French and Italian texts, respectively. Then, we applied a cut-off value for removing all unique words present fewer than 5 times in the French and Italian texts preliminary to the DESeq2 analysis, resulting in 10,315 and 10,645 unique words for the French and Italian texts, respectively. Subsequently, plague-related and control text word counts were compared using the DESeq2 R package with default parameters (version 1.22.2). This approach identified 70 French and 147 Italian terms that were overrepresented in plague-related texts compared to control ones ( $P_{\text{adjust}} < 0.05$  and  $\log_2\text{foldchange} > 0$ ) and 213 French and 313 Italian words that were present  $> 4$  times in plague-related texts compared to controls ( $\log_2\text{foldchange} > 2$ ) (Data files S3 and S8).

## Nested analysis

In a second step, we used a “nested” analysis to identify the words that lay in close proximity to overrepresented words in the plague-related texts. We extracted words located  $\pm 25$  words apart from significant terms and compared them to the remaining part of the texts using DESeq2. Significant words (adjusted  $P$  value  $\leq 0.001$  and  $\log_2\text{FoldChange} > 0$ ) were plotted using the “wordcloud” R package (version 2.6) (Data files S5 and S9).

## Word translation

All the French and Italian words were translated into English using the translation function in Microsoft® Word. Each overrepresented (only the words with  $P < 0.05$  or  $\log_2\text{foldchange} > 0$ ) and nested (words associated with overrepresented words) words were controlled by the operators for mistranslation and then corrected. Words with no English translation were maintained as they were; this was the case for one French word, “corbeau” (a person responsible for burying plague victims), and 4 Italian words, namely, “monatti” (people responsible for burying plague victims), “espurgatori” (people responsible for stuff purging), “untori” (people accused of intentionally spreading the disease using “special” ointments), “caldiera” (a tool used to untie the cocoons of silkworms), with no direct English translation. Words exhibiting an “out of context” translation were also manually corrected, such as “carbone”, “tacchi”, and “unti” in Italian and “preservatif” in French texts.

## Network Representation using Gephi

Graphical representation of the nested analysis results was performed using the software Gephi 0.9.2 [55]. This software was used exclusively for representation purposes of the data and statistics obtained by the nested analysis. The results of this analysis were converted into nodes and edges to generate the network. At each node, a word was obtained from the nested analysis, and the edges between two words represented the association between these words. Only words with a strong statistical significance ( $P_{adj} < 0.01$ ) were represented. The spatial position of the words in the network has no statistical meaning. To maximize the efficiency of the comparison between the French and Italian datasets, for the construction of the comparison networks, the words nested with the word of interest and the words with which the word of interest was nested were used. Therefore, an edge was created each time a word of interest was associated with another word with a significance determined by a  $P_{adj} < 0.01$ .

## H2: Supplementary Materials

Supplementary materials and methods.

Fig. S1. Jaccard index analyses for French texts corpus (A) (plague related-texts and control texts) and for Italian texts corpus (B).

Fig. S2. Volcano plot obtained from the analysis of the French texts corpus (A) and Italian texts corpus (B), generated using the DESeq2 package ( $\log_2\text{foldchange} > 0$  and  $P_{\text{adj}} \leq 0.05$ ).

Fig. S3. WordClouds generated from the nested analysis of French plague-related overrepresented words.

Fig. S4. WordClouds generated from the nested analysis of Italian plague-related overrepresented words.

Fig. S5. Word network representation for selected words from the Great Plague of Marseille (1720-1722).

Fig. S6. Word network representation of words associated to potential sources of plague.

Table S1. Statistical table summarizing the number of raw, filtered, used and unique words for each French plague-related texts and control texts.

Table S2. Statistical table summarizing the number of raw, filtered, used and unique words for each Italian plague-related texts and control texts.

Data files S1. Historical French text related to the 1720-1722 Great Plague of Marseille.

Data files S2. Plague-unrelated French texts dating from the same historical period of the Great Plague of Marseille which were used as controls.

Data files S3. All French words raw data generated by Deseq2 analysis.

Data files S4. List of the overrepresented plague-related words with specific classification into 19 categories of words.

Data files S5. All French words raw data generated by “nested” Deseq2 analysis.

Data files S6. Historical Italian text related to the 1629-1631 plague epidemic in Northern Italy.

Data files S7. Plague-unrelated Italian texts dating from the same historical period of the plague epidemic in Northern Italy which were used as controls.

Data files S8. All Italian words raw data generated by Deseq2 analysis.

Data files S9. All Italian words raw data generated by “nested” Deseq2 analysis.

# References

1. PERRY RD, FETHERSTON JD. 1997 YERSINIA PESTIS--ETIOLOGIC AGENT OF PLAGUE. *CLIN. MICROBIOL. REV.* 10, 35–66.
2. DRANCOURT M, ABOUDHARAM G, SIGNOLI M, DUTOIR O, RAOULT D. 1998 DETECTION OF 400-YEAR-OLD YERSINIA PESTIS DNA IN HUMAN DENTAL PULP: AN APPROACH TO THE DIAGNOSIS OF ANCIENT SEPTICEMIA. *PROC. NATL. ACAD. SCI.* 95, 12637–12640.
3. GILBERT MTP, CUCCUI J, WHITE W, LYNNERUP N, TITBALL RW, COOPER A, PRENTICE MB. 2004 ABSENCE OF YERSINIA PESTIS-SPECIFIC DNA IN HUMAN TEETH FROM FIVE EUROPEAN EXCAVATIONS OF PUTATIVE PLAGUE VICTIMS. *MICROBIOLOGY* 150, 341–354.
4. SCHUENEMANN VJ ET AL. 2011 TARGETED ENRICHMENT OF ANCIENT PATHOGENS YIELDING THE P<sub>PCP1</sub> PLASMID OF *YERSINIA PESTIS* FROM VICTIMS OF THE BLACK DEATH. *PROC. NATL. ACAD. SCI.* 108, E746–E752.
5. BOS KI ET AL. 2011 A DRAFT GENOME OF YERSINIA PESTIS FROM VICTIMS OF THE BLACK DEATH. *NATURE* 478, 506–510.
6. BOS KI ET AL. 2016 EIGHTEENTH CENTURY YERSINIA PESTIS GENOMES REVEAL THE LONG-TERM PERSISTENCE OF AN HISTORICAL PLAGUE FOCUS. *ELIFE* 5, e12994.
7. SPYROU MA ET AL. 2019 PHYLOGEOGRAPHY OF THE SECOND PLAGUE PANDEMIC REVEALED THROUGH ANALYSIS OF HISTORICAL YERSINIA PESTIS GENOMES. *NAT. COMMUN.* 10, 1–13.
8. KARLSSON G. 1996 PLAGUE WITHOUT RATS: THE CASE OF FIFTEENTH-CENTURY ICELAND. *J. MEDIEV. HIST.* 22, 263–284.
9. BENEDICTOW OJ. 2004 THE TERRITORIAL ORIGIN OF PLAGUE AND OF THE BLACK DEATH. *BENEDICT. OJ BLACK DEATH*, 1346–1353.
10. KELLY J. 2005 *THE GREAT MORTALITY: AN INTIMATE HISTORY OF THE BLACK DEATH, THE MOST DEVASTATING PLAGUE OF ALL TIME*/JOHN KELLY. NEW YORK: HARPERCOLLINS PUBL.
11. ERSGÅRD L. 2016 CHANGE, DESERTION AND SURVIVAL: AN ARCHAEOLOGY OF THE LATE-MEDIEVAL CRISIS.
12. CHRISTAKOS G, OLEA RA, YU H-L. 2007 RECENT RESULTS ON THE SPATIOTEMPORAL MODELLING AND COMPARATIVE ANALYSIS OF BLACK DEATH AND BUBONIC PLAGUE EPIDEMICS. *PUBLIC HEALTH* 121, 700–720.
13. DEAN KR, KRAUER F, WALLØE L, LINGJÆRDE OC, BRAMANTI B, STENSETH NC, SCHMID BV. 2018 HUMAN ECTOPARASITES AND THE SPREAD OF PLAGUE IN EUROPE DURING THE SECOND PANDEMIC. *PROC. NATL. ACAD. SCI.* 115, 1304–1309.
14. MONECKE S, MONECKE H, MONECKE J. 2009 MODELLING THE BLACK DEATH. A HISTORICAL CASE STUDY AND IMPLICATIONS FOR THE EPIDEMIOLOGY OF BUBONIC PLAGUE. *INT. J. MED. MICROBIOL.* 299, 582–593.
15. MASSAD E, COUTINHO FA, BURATTINI MN, LOPEZ LF. 2004 THE EYAM PLAGUE REVISITED: DID THE VILLAGE ISOLATION CHANGE TRANSMISSION FROM FLEAS TO PULMONARY? *MED. HYPOTHESES* 63, 911–915.



- 508 **16. BEGIER EM ET AL. 2006 PNEUMONIC PLAGUE CLUSTER, UGANDA, 2004. *EMERG. INFECT.***  
509 ***Dis.* 12, 460–467. (doi:10.3201/EID1203.051051)**
- 510 **17. DEAN KR, KRAUER F, SCHMID BV. 2019 EPIDEMIOLOGY OF A BUBONIC PLAGUE OUTBREAK**  
511 **IN GLASGOW, SCOTLAND IN 1900. *R. SOC. OPEN SCI.* 6, 181695.**
- 512 **18. HUFTHAMMER AK, WALLØE L. 2013 RATS CANNOT HAVE BEEN INTERMEDIATE HOSTS FOR**  
513 **YERSINIA PESTIS DURING MEDIEVAL PLAGUE EPIDEMICS IN NORTHERN EUROPE. *J.***  
514 ***ARCHAEOL. SCI.* 40, 1752–1759.**
- 515 **19. HOUHAMDI L, LEPIDI H, DRANCOURT M, RAOULT D. 2006 EXPERIMENTAL MODEL TO**  
516 **EVALUATE THE HUMAN BODY LOUSE AS A VECTOR OF PLAGUE. *J. INFECT. Dis.* 194, 1589–**  
517 **1596.**
- 518 **20. IRELAND WH. 1832 *VORTIGERN: AN HISTORICAL PLAY; WITH AN ORIGINAL PREFACE.* J.**  
519 **THOMAS.**
- 520 **21. SIMPSON WJ. 1905 *A TREATISE ON PLAGUE DEALING WITH THE HISTORICAL,***  
521 ***EPIDEMIOLOGICAL, CLINICAL, THERAPEUTIC AND PREVENTIVE ASPECTS OF THE DISEASE.***  
522 **UNIVERSITY PRESS.**
- 523 **22. CRAWFURD RHP. 1914 *PLAGUE AND PESTILENCE IN LITERATURE AND ART.* CLARENDON**  
524 **PRESS.**
- 525 **23. COHN SK. 2008 4 EPIDEMIOLOGY OF THE BLACK DEATH AND SUCCESSIVE WAVES OF**  
526 **PLAGUE. *MED. HIST.* 52, 74–100.**
- 527 **24. BENEDICTOW OJ. 2019 EPIDEMIOLOGY OF PLAGUE: PROBLEMS WITH THE USE OF**  
528 **MATHEMATICAL EPIDEMIOLOGICAL MODELS IN PLAGUE RESEARCH AND THE QUESTION OF**  
529 **TRANSMISSION BY HUMAN FLEAS AND LICE. *CAN. J. INFECT. Dis. MED. MICROBIOL.* 2019.**
- 530 **25. LOVE MI, HUBER W, ANDERS S. 2014 MODERATED ESTIMATION OF FOLD CHANGE AND**  
531 **DISPERSION FOR RNA-SEQ DATA WITH DESEQ2. *GENOME BIOL.* 15, 550.**
- 532 **26. RAOULT D, ABOUDHARAM G, CRUBÉZY E, LARROUY G, LUDÉS B, DRANCOURT M. 2000**  
533 **MOLECULAR IDENTIFICATION BY “SUICIDE PCR” OF YERSINIA PESTIS AS THE AGENT OF**  
534 **MEDIEVAL BLACK DEATH. *PROC. NATL. ACAD. SCI.* 97, 12800–12803.**
- 535 **27. BENEDICTOW OJ. 1987 MORBIDITY IN HISTORICAL PLAGUE EPIDEMICS. *POPUL. STUD.* 41,**  
536 **401–431.**
- 537 **28. D’AMATO A, ZILBERSTEIN G, ZILBERSTEIN S, COMPAGNONI BL, RIGHETTI PG. 2018 OF**  
538 **MICE AND MEN: TRACES OF LIFE IN THE DEATH REGISTRIES OF THE 1630 PLAGUE IN**  
539 **MILANO. *J. PROTEOMICS* 180, 128–137. (doi:10.1016/J.JPROT.2017.11.028)**
- 540 **29. DEWING HB. 1914 *PROCOPIUS: HISTORY OF THE WARS.* WILLIAM HEINEMANN.**
- 541 **30. CHAULIAC G DE. 1641 *LA GRANDE CHIRURGIE.* SIMON RIGAUD.**
- 542 **31. YERSIN A. 1894 LA PESTE BUBONIQUE A HONG-KONG. *ANN INST PASTUR* 2, 428–430.**
- 543 **32. SIMOND P-L. 1898 *LA PROPAGATION DE LA PESTE.* ANNALES DE L’INSTITUT PASTEUR.**

33. 1721 *TRAITE DE LA PESTE RECUEILLI, DES MEILLEURS AUTEURS ANCIENS & MODERNES. ET ENRICHI DE REMARQUES & OBSERVATIONS THEORIQUES & PRATIQUES. PAR LE SR. MANGET D. EN M. MEDECIN DE LA PERSONNE DE S.M. LE ROI DE PRUSSE ... AVEC UNE TABLE TRES AMPLE DES MATIERES. PREMIERE [-SECONDE] PARTIE.*
34. TATUSOV RL, KOONIN EV, LIPMAN DJ. 1997 A GENOMIC PERSPECTIVE ON PROTEIN FAMILIES. *SCIENCE* 278, 631–637. (doi:10.1126/SCIENCE.278.5338.631)
35. SEBBANE F, GARDNER D, LONG D, GOWEN BB, HINNEBUSCH BJ. 2005 KINETICS OF DISEASE PROGRESSION AND HOST RESPONSE IN A RAT MODEL OF BUBONIC PLAGUE. *AM. J. PATHOL.* 166, 1427–1439. (doi:10.1016/S0002-9440(10)62360-7)
36. FIOCCHETTO G. 1720 *TRATTATO DELLA PESTE, O SIA CONTAGIO DI TORINO DELL'ANNO 1630. DESCRITTO DAL PROTOMEDICO GIANFRANCESCO FIOCHETTO ED IN QUESTA SECONDA EDIZIONE IN PIU LUOGHI CORRETTO, ED ACCRESCIUTO DI ALCUNI RICORDI SALUTEVOLI IN OCCORRENZA DI PESTE; AGGIUNTEVI IN FINE VARIE NOTIZIE CONCERNENTI IL MORBO CONTAGIOSO, CHE ORA NELLA PROVENZA SI VA DILATANDO .. PER GIUSEPPE ZAPPATA, STAMPATORE DELL'ILLUSTRISSIMA CITTÀ.*
37. THEILMANN J, CATE F. 2007 A PLAGUE OF PLAGUES: THE PROBLEM OF PLAGUE DIAGNOSIS IN MEDIEVAL ENGLAND. *J. INTERDISCIP. HIST.* 37, 371–393.
38. WALLØE L. 2008 3 MEDIEVAL AND MODERN BUBONIC PLAGUE: SOME CLINICAL CONTINUITIES. *MED. HIST.* 52, 59–73.
39. COSTEDOAT C, LAMI A, SIGNOLI M, CHEVE D. 2020 2020 EN TEMPS D'EPIDEMIE: LA PESTE EN FILIGRANE? *RECH. ÉDUCTIONS*
40. EISEN RJ, BEARDEN SW, WILDER AP, MONTENIERI JA, ANTOLIN MF, GAGE KL. 2006 EARLY-PHASE TRANSMISSION OF *YERSINIA PESTIS* BY UNBLOCKED FLEAS AS A MECHANISM EXPLAINING RAPIDLY SPREADING PLAGUE EPIZOOTICS. *PROC. NATL. ACAD. SCI.* 103, 15380–15385. (doi:10.1073/PNAS.0606831103)
41. TADINO A. 1648 *RAGUAGLIO DELL'ORIGINE ET GIORNALI SUCCESSI DELLA GRAN PESTE CONTAGIOSA, VENEFICA, & MALEFICA SEGUITA NELLA CITTÀ DI MILANO, & SUO DUCATO DALL'ANNO 1629. SINO ALL'ANNO 1632. CON LE LORO SUCCESSIUE PROVISIONI, ET ORDINI. AGGIUNTOUI UN BREVE COMPENDIO DELLE PIU SEGNALATE SPECIE DI PESTE IN DIUERSI TEMPI OCCORSE... CON DIUERSI ANTIDOTI DESCRITTI DA ALESSANDRO TADINO ... PER FILIPPO GHISOLFI.*
42. PRIORATO CONTE GG. 1672 *HISTORIA DI FERDINANDO TERZO IMPERATORE: PARTE PRIMA. APPRESSO MATTEO COSMEROVIO.*
43. ALFANI G, PERCOCO M. 2019 PLAGUE AND LONG-TERM DEVELOPMENT: THE LASTING EFFECTS OF THE 1629–30 EPIDEMIC ON THE ITALIAN CITIES. *ECON. HIST. REV.* 72, 1175–1201. (doi:10.1111/EHR.12652)
44. SAMOILOVICH D. 1783 *MEMOIRE SUR LA PESTE: QUI, EN 1771, RAVAGEA L'EMPIRE DE RUSSIE, SUR-TOUT MOSCOU, LA CAPITALE, & OU SONT INDIQUES LES REMEDES POUR LA GUERIR, & LES MOYENS DE S' EN PRESERVER. A PARIS: CHEZ LECLERC, LIBRAIRE...; A ST. PETERSBOURG: CHEZ M. WILKOWSKY; A ....*

- 584 **45. CIPOLLA CM. 1994 *BEFORE THE INDUSTRIAL REVOLUTION: EUROPEAN SOCIETY AND***  
585 ***ECONOMY, 1000-1700 (THIRD EDITION). W. W. NORTON & COMPANY.***
- 586 **46. GHIRARDELLI L. IN PRESS. IL MEMORANDO CONTAGIO SEGUITO IN BERGAMO L'ANNO 1630.**  
587 ***BERGAMO F LLI ROSSI STAMP. 1681.***
- 588 **47. RAOULT D, ROUX V. 1997 RICKETTSIOSES AS PARADIGMS OF NEW OR EMERGING**  
589 **INFECTIOUS DISEASES. *CLIN. MICROBIOL. REV.* 10, 694–719.**
- 590 **48. GROSS L. 1996 HOW CHARLES NICOLLE OF THE PASTEUR INSTITUTE DISCOVERED THAT**  
591 **EPIDEMIC TYPHUS IS TRANSMITTED BY LICE: REMINISCENCES FROM MY YEARS AT THE**  
592 **PASTEUR INSTITUTE IN PARIS. *PROC. NATL. ACAD. SCI. U. S. A.* 93, 10539.**
- 593 **49. NICOLLE C, COMTE C, CONSEIL E. 1909 EXPERIMENTAL TRANSMISSION OF THE TYPHUS**  
594 **EXANTHEMATICS BY THE BODY LOUSE. *ACAD. SCI. PARIS***
- 595 **50. LETHEN W. 1923 THE EPIDEMIOLOGY OF BUBONIC PLAGUE IN GREAT BRITAIN, WITH**  
596 **SPECIAL REFERENCE TO ITS SPREAD BY PULEX IRRITANS. *J. STATE MED.* 31.**
- 597 **51. DELANOË P. 1932 L'IMPORTANCE DE LA PUCE DE L'HOMME, PULEX IRRITANS L., DANS LES**  
598 **EPIDEMIES DE PESTE AU MAROC. *BULL. SOCIETE PATHOL. EXOT.* 25, 958–960.**
- 599 **52. BLANC G, BALTAZARD M. 1942 ROLE DES ECTOPARASITES HUMAINS DANS LA**  
500 **TRANSMISSION DE LA PESTE. *BULL ACAD NATL MED* 126, 446.**
- 501 **53. DAVIS DE. 1986 THE SCARCITY OF RATS AND THE BLACK DEATH: AN ECOLOGICAL**  
502 **HISTORY. *J. INTERDISCIP. HIST.* 16, 455–470. (doi:10.2307/204499)**
- 503 **54. MANZONI AFTA. 1827 *I PROMESSI SPOSI.***
- 504 **55. BASTIAN M, HEYMAN S, JACOMY M. 2009 GEPHI: AN OPEN SOURCE SOFTWARE FOR**  
505 **EXPLORING AND MANIPULATING NETWORKS. , 2.**

## Acknowledgments

**Funding:** This work was supported by the French Government under the Investissements d'avenir (Investments for the Future) program managed by the Agence Nationale de la Recherche (ANR, fr: National Agency for Research) (reference: Méditerranée Infection 10-IAHU-03). This work was supported by Région Le Sud (Provence Alpes Côte d'Azur) and European funding FEDER IHU PRIMMI. The authors acknowledge Pierre Pontarotti (IHU-CNRS) for fruitful discussions about text analysis.

**Author contributions:** R.B. and R.N. performed data processing and analysis, interpreted the data, drafted the manuscript, and prepared figures. M.S. and S.E. interpreted the data and drafted the manuscript. D.R. and M.D. designed the study, interpreted the data, and drafted the manuscript. All authors reviewed the manuscript.

**Competing interests:** The authors declare no competing interests.

**Data and materials availability:** All data needed to evaluate the conclusions in the paper are present in the paper and/or the Supplementary Materials.

## Figures and Tables

### Overrepresented or nested words considered as plague sources during the Geat plague of Marseille 1720-1722

| Word        | Occurrence | Numbers of time where the term is used as a plague source | Percentage |
|-------------|------------|-----------------------------------------------------------|------------|
| Merchandise | 810        | 561                                                       | 69%        |
| Tatters     | 225        | 196                                                       | 87%        |
| Movable     | 207        | 194                                                       | 94%        |
| Clothes     | 153        | 128                                                       | 83%        |
| Air         | 233        | 86                                                        | 37%        |
| Meat        | 133        | 8                                                         | 6%         |
| Dog         | 282        | 87                                                        | 31%        |

### Overrepresented or nested words considered as plague sources during the plague epidemic of 1629-1631 in Northern Italy

| Word      | Occurrence | Numbers of time where the term is used as a plague source | Percentage |
|-----------|------------|-----------------------------------------------------------|------------|
| Stuff     | 466        | 419                                                       | 90%        |
| Feather   | 29         | 26                                                        | 90%        |
| Clothes   | 89         | 55                                                        | 62%        |
| Bed Sheet | 25         | 15                                                        | 60%        |
| Air       | 180        | 98                                                        | 54%        |
| Bed       | 146        | 58                                                        | 40%        |

**Table 1. Overrepresented or nested words considered as plague sources in the analyzed records.** Table representing the number of occurrences of each

suspected plague source in plague-related texts from Marseille and Northern Italy featuring the percentage each word is used by ancient authors as a source of plague. Words for the “bona fide” analysis were selected depending on the results of the nested analysis, for the association with plague-related words.

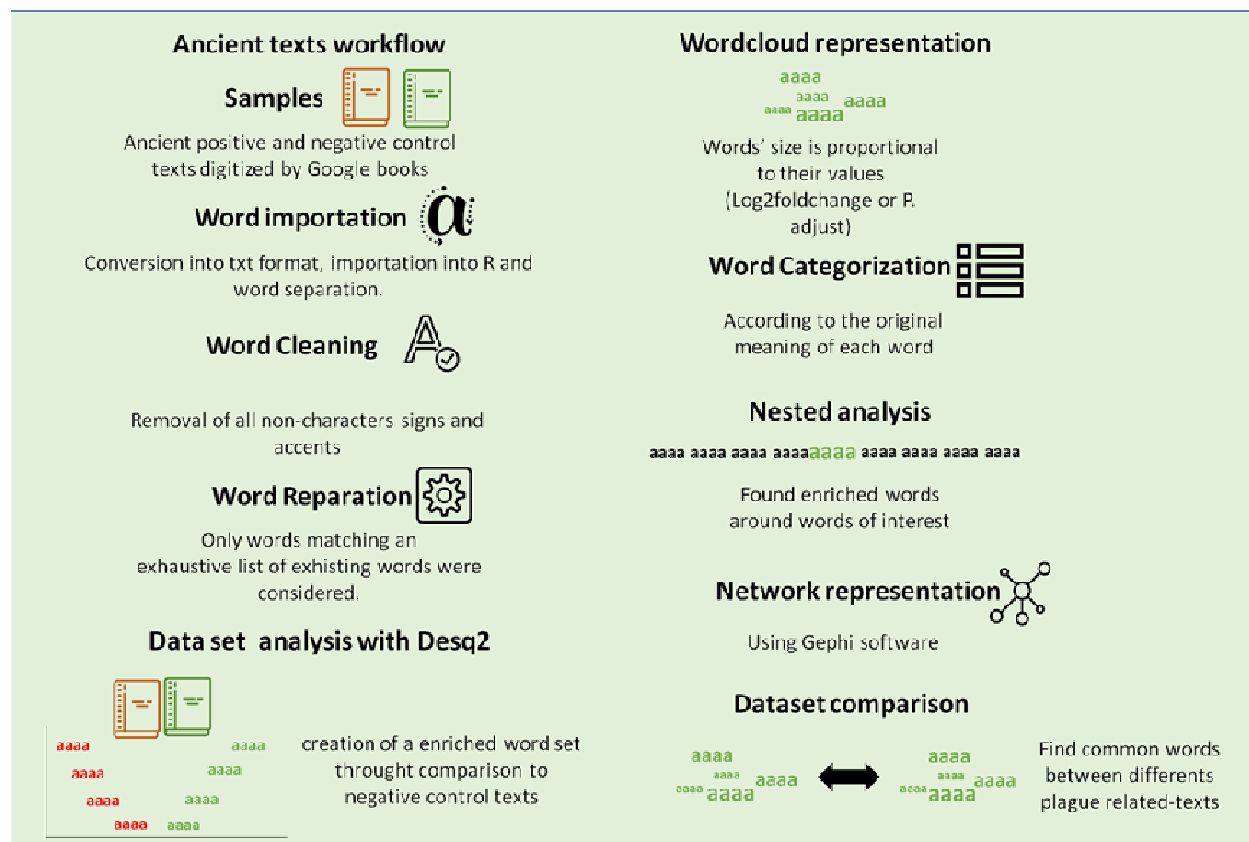

**Fig. 1. Workflow summarizing the main steps of the method developed in this study.**



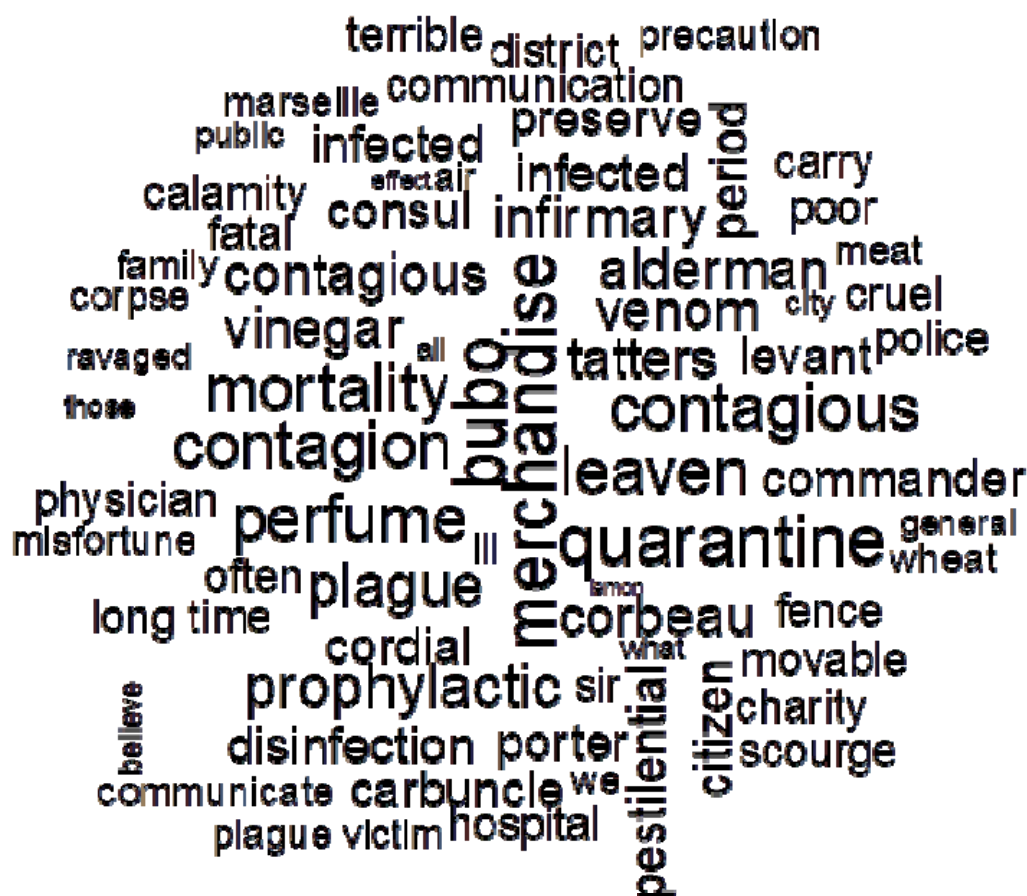

**Fig. 2.** Wordcloud displaying the words that were overrepresented in the Marseille plague-related texts ( $P_{adj} \leq 0.05$  and  $\log_2 \text{foldchange} > 0$ ). The size of the words represents their adjusted P enrichment in plague-related texts compared to negative control texts.



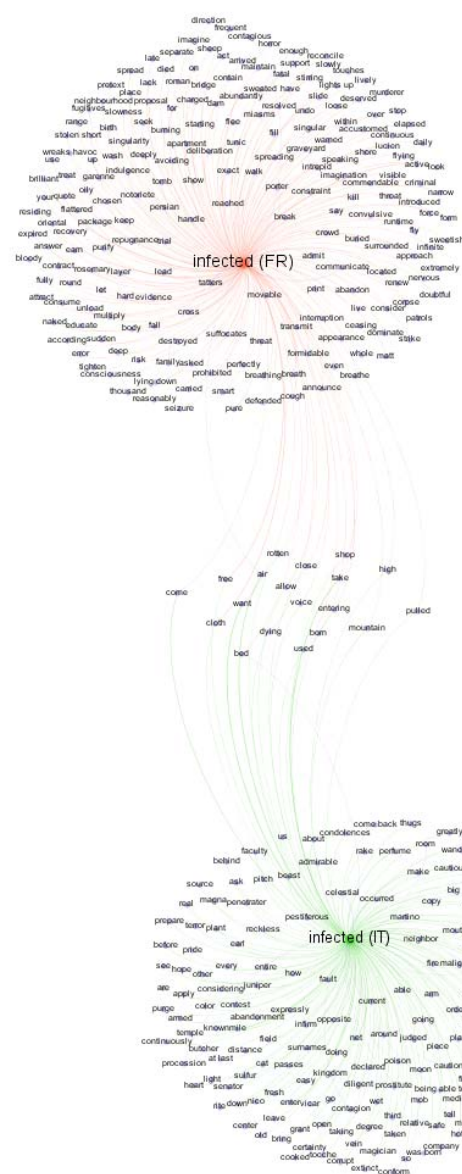

**Fig. 4.** Network representation of the relations between words generated using Gephi software based on the adjusted P values from the nested analysis ( $P_{adj} < 0.01$ ) of the word “infected” (in green for Marseille and in orange for Northern Italy). Word label dimensions are proportional to the number of links with other words.

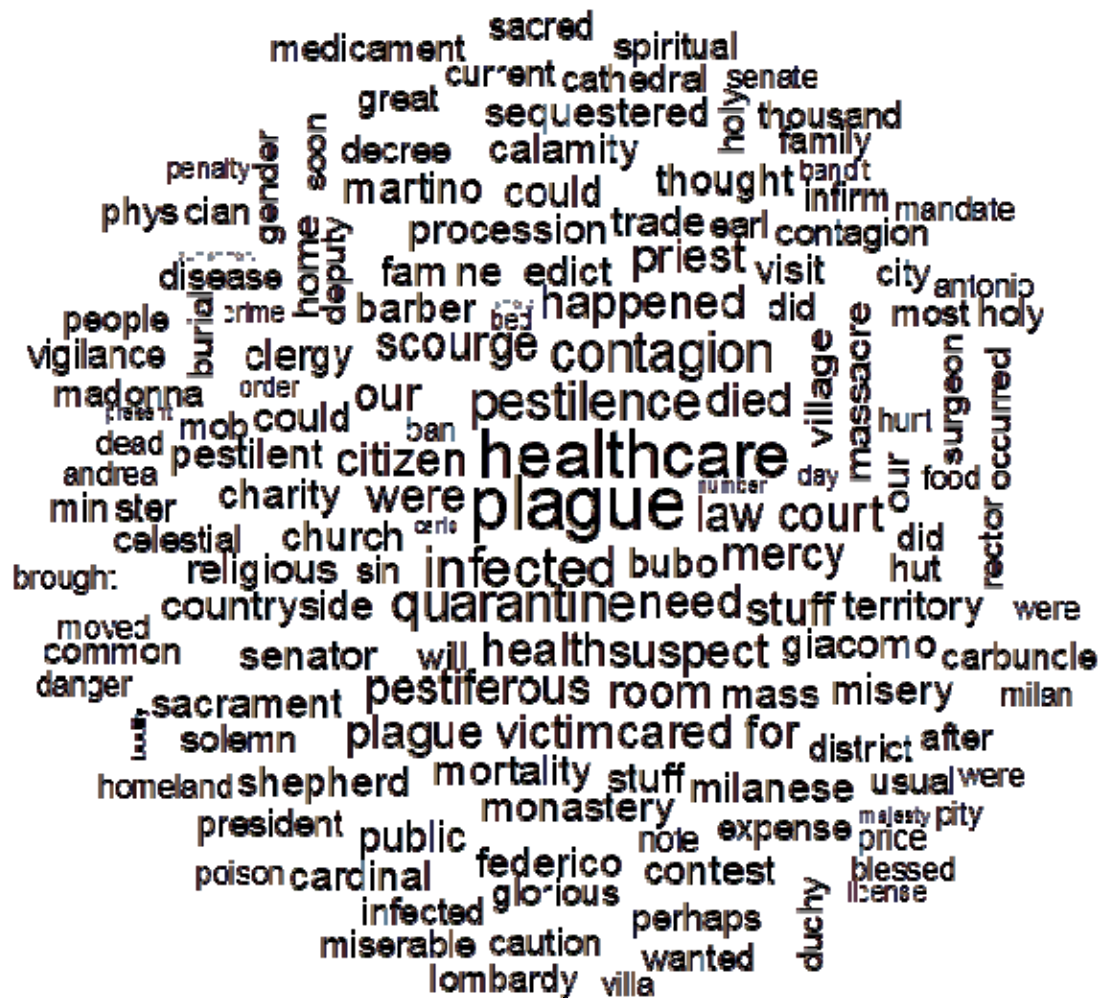

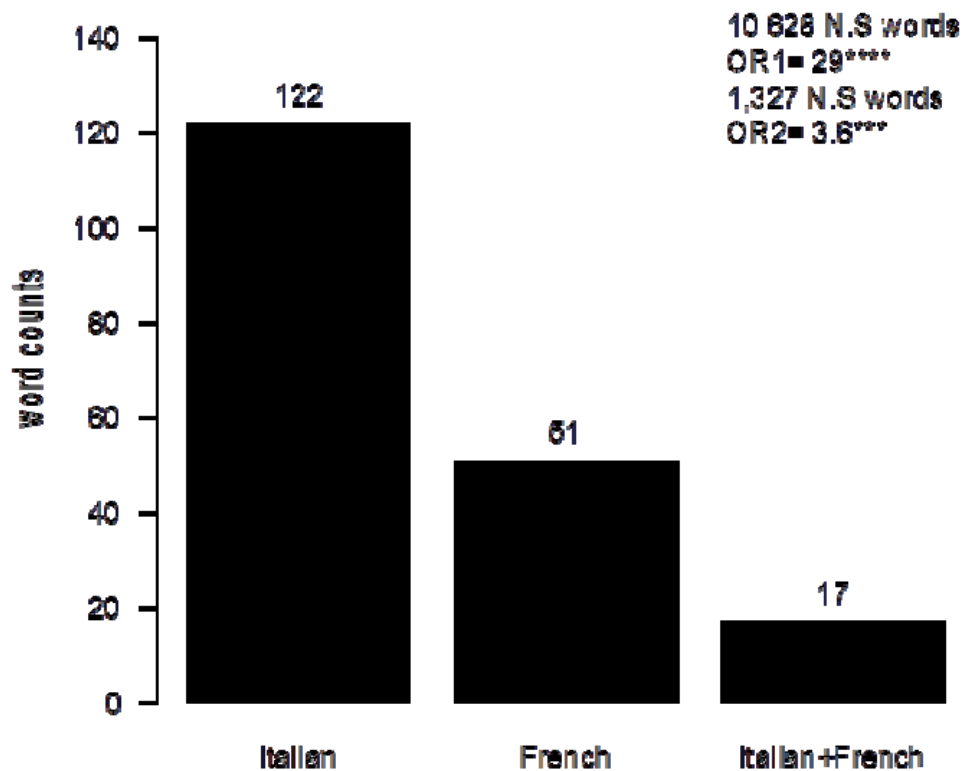

**Fig. 6.** Barplot displaying the numbers of unique significantly over-represented words from Italian (IT) or French (FR) or shared between both. The overlap of significantly over-represented words between Italian and French texts was tested using fisher test on all non-significant words (OR1) or non-significant words with a baseMean > than the lower quartile of significant words (OR2). Pval<0.001\*\*\*; Pval<0.00001\*\*\*\*



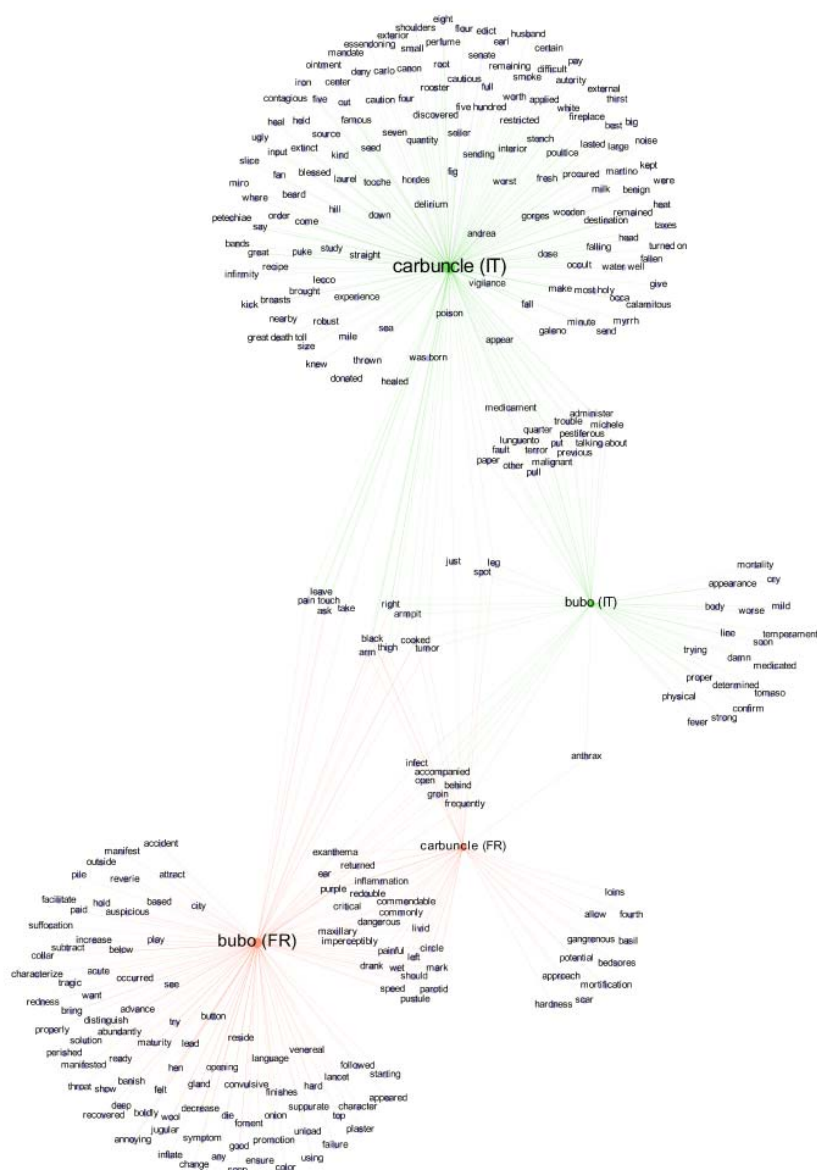

**Fig. 7.** Word network representation of words related to two plague symptoms, “carbuncle” and “bubo”, from the Marseille plague (displayed in green) and the Northern Italy plague (displayed in orange). Network generated with Gephi software based on the adjusted P values from the nested analysis ( $P_{adj} < 0.01$ ). Word label dimensions are proportional to the number of links with other words.

fountain  
mine pulled  
pure breathe  
attach newly  
breathe  
thousand  
forget  
answer  
corrupt  
this  
bad  
purify  
pure  
resume

before established  
capital walking communication  
enter form place spread  
foodstuffs limits excite  
narrow counterpartway  
high which  
main buy fence discharge  
provision concordat save  
avenue pose confer  
passage uncertainty lifted  
live guard prepare  
notredame keep  
examine end

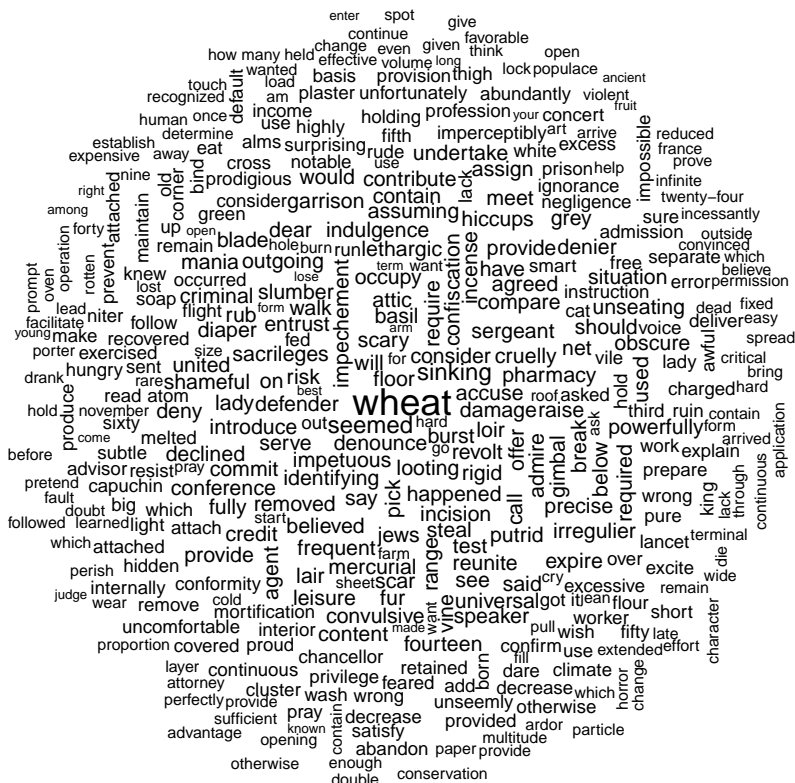

hard using  
purple  
carbuncle  
armpit deep  
maxillary play  
jugular circle groin show  
arm maturity bubo lancet  
pustule returned below  
lead parotid solution wool  
critical soap good  
behind high gland purple open  
banish throat left dangerous  
finishes tumor  
annoying

usefully covered  
extremely extended  
deep  
bowels throw fountain  
hungry narrow member  
commonly live play proximity  
miserably consume bury livid  
earth remove return discover enough  
dead concern bastion lifted street  
infection dumper up straw  
intrepid increasing  
covered buried vain  
mother handle train filled rotten fill  
lime darkness live tree  
discovered graveyard lifted death  
thousand walk dragged  
open worker show  
inflammation open



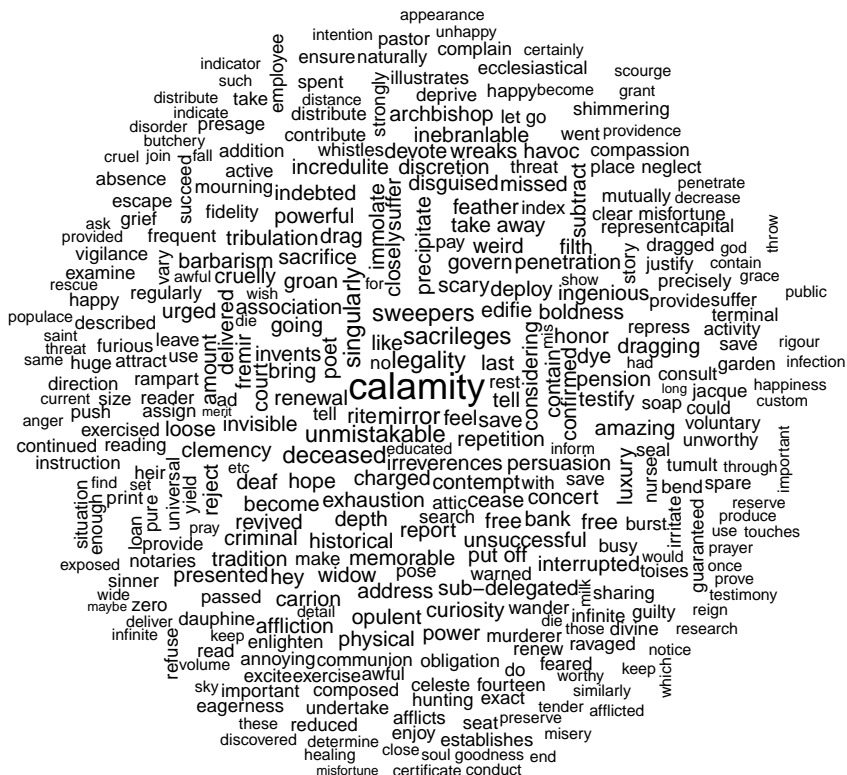

those

the

carbuncle  
exanthema  
leg  
thigh  
arm  
pustule  
bubo  
tumor  
dangerous  
parotid  
groin  
infection

game next  
christian  
zealous roman  
charity  
devote intrepid  
alms  
poor

municipal  
main assemble  
represent  
citizen  
notable  
dear speaker  
homeland

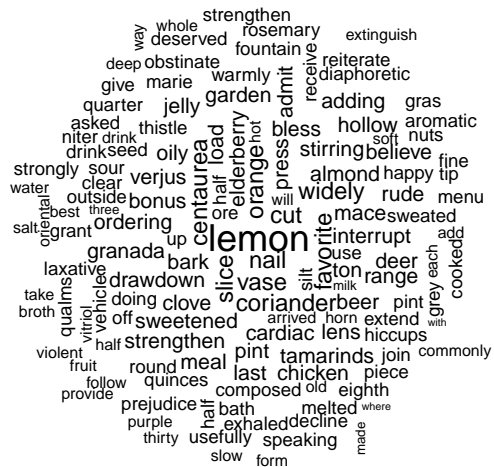



fountain required  
butchery balm  
vaucresson  
commander  
suffer hollow armed  
warmly castle  
paper rancid  
chancellor charles  
marecha

approach  
avoid ensure  
free break  
fear no contract pray  
avoiding sequester  
**communication**  
between ban visible  
intimidate assign  
gallows  
contain train

perfect immediately receive decrease  
compliant model would  
convenience flour currently doubt husband  
those live attach attract way enemy  
separate add doubtful infect explanation accustomed  
lead happy daily it managed free free indicate slow  
forced agreed limits separate sheep spread  
hidden even will lose  
error divide purity jews extraordinary approach  
complain can mix eternal defended probably capital want  
keep lack reiterated seizure swell with reconcile continue  
finished multiply fly assume chaplain abundantly  
wear readiness unique putrid communicate deprive basis  
decrease operate like go compare preventing exhale bind  
force active mis frequent transmit real nation passage  
necessarily serve civil cobbler garenne shoe uniform cloth  
retirement like meet complained take lady deliberate  
prince trial freely ready insane save acquired custom  
dare channel front debauchery confused division separate  
convinced exact convince visiting submit conjecture  
prohibited sement immediate breath chest pretext  
project almost delayed consult active terminal  
viewing wrong compose infallible fixed penetrate  
accompanied facilitate communicate

homeland  
consul

continuous  
prove commonly  
evidence error lady persuade  
pretended show menu increase  
repugnance popular old pernicious  
to watch active examination use win necessarily  
satisfy speak shorten length operate boldly  
notwithstanding persuaded caused themselves distinguish  
persuade free positively consult reign think  
laugh inform aspect civil disposed copy best  
march meeting calm dysentery report paid hunting close  
mark observe check transmit like lifts up  
excite verily observed  
steam ruin based with tell separated hear clearly  
spread redouble alexander tank nine admit palace  
france deadly temerity off acute passed  
presently alexander transmit continuation  
disease undertake exhale  
pernicious separately finish mount print  
warned pull deny charles noble  
finished important atom prevented doubt  
common produced examine  
neglected certainly

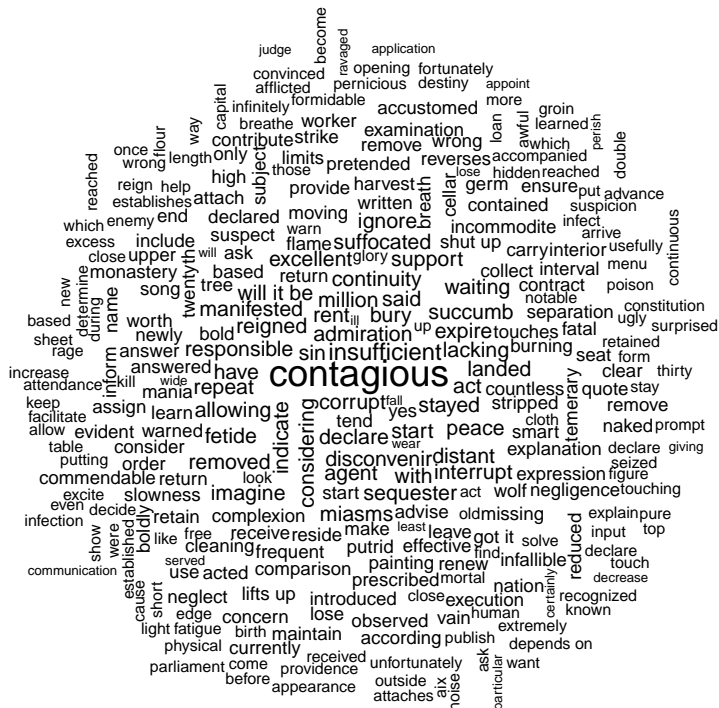



contagion<sup>the</sup>

dangerous  
 pledge depends  
 help proximity  
 add cleaning bed  
 dumper commonly  
 lacking declare  
 content fall enjoy  
 serve cover fillify and  
 absolute sowers  
 wanderer shat  
 find missed  
 transport job  
 important avignon return  
 open delivered  
 approach keep abandon  
 bourgeois  
 thirty-five  
 covered  
 free  
 come  
 shoe carrier  
 sweepers activity  
 lived  
 serve  
 cobble order  
 overwhelming  
 bathe renew  
 deep  
 error  
 handle  
 bury clean  
 core

attached  
prescribed  
purify keep hearty purgative  
interior increase  
abound lacking failure  
active pharmacy  
era<sup>the</sup> helping unnecessarily  
spirit diaphoretic<sup>fifth</sup>  
regime sulphur decoction laxative<sup>is off</sup> cordial<sup>slightly soft</sup> vulnerary provide  
ardor satisfied elixir freshness round twenty-four  
dejection benign irritation emetique  
light cleaning preference best  
making use palpitation adding sometimes  
oriental put viper strengthen  
reiterate theriac  
internally laugh sudorific  
usefully

slow come  
attaches infinite established  
destiny said accompanied close  
usefully say precious attached pretend  
fatigue educated providence happy pray compose violent  
whole noble myself temerity want chancellor caused  
spread want currently deny reverses comparison universal remain lived qualms  
annoying powerful look value discover died obstacle ballast  
which took blind sweat admit will provide necessarily  
important spend will suffer can paradox decreasing concern  
publishes offer condemn depth submit steam frequent reader hold ecclesiastical  
engage learn ignore should dissipation concentrate day take strongly respect  
prodigious self spend feeling presumption operate persuade increase big provide  
opinion will credulity that approach lets end browsing TRUE entrust ignorance cluster dangerous  
capital popular real kill warn must viscous fill neant unfair voluntarily approach searches accuracy refusal form  
sweetness increase healed deserved doing touch turkish these ensure foresight generous abuse contest closed put off order waiting access tell destroy  
reiterated over cruelty will expedient shield cruelly uncertain mine other battle approval born hear  
ancient occurred discovery excite new even pretend described read vine sing interrupted redoubt gain agitation hidden appearance  
advantageous ensure reiterate over cruelty will expedient shield cruelly uncertain mine other battle approval born hear  
respect compensated camping slightly evidence use agent people feel speed give  
continuous menu united loan smell had repande birth rude vulgar perished provide  
conjecture seized laughing colic confess misthose similar convert many lack returned form  
passage doubt FALSE natural convince expression which wander how examine more  
terminal wish contribute negligence interior set probably irritation unique lady verry notice  
compliant abandoned communicated infection gras attached  
explain excite oriental perfume start century arrived  
judgment pure wrong impossible reign  
extremely discover violent believe secret

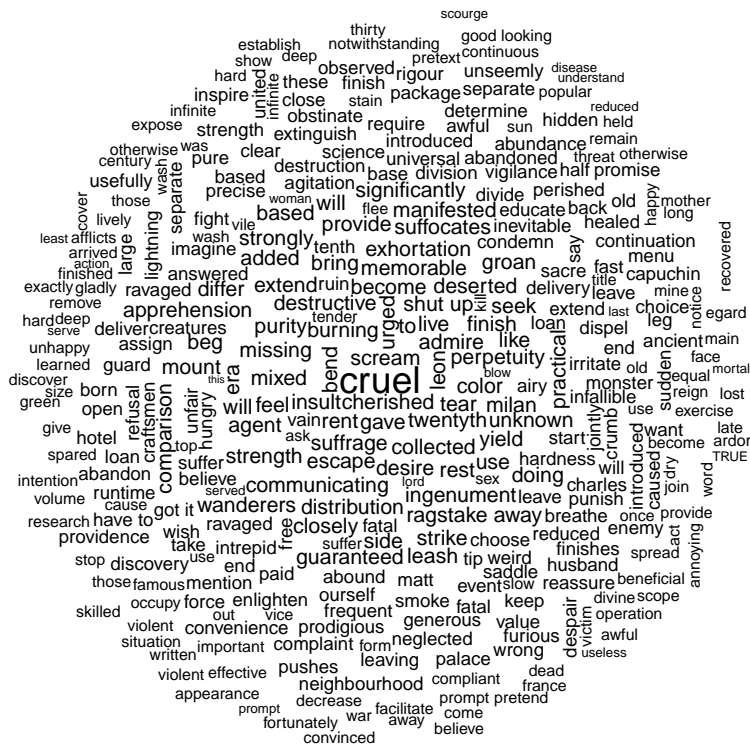

disinfect  
disinfection  
repair  
chapel movable  
made



warn  
alderman

product  
**effect**  
produce

increase decrease  
strike convenient retirement  
continuous house quote purge dead  
infinite deep breathe remove  
form whole condemn pregnant answer want  
tender prodigious assign cleaning deliver maintain  
away provide want pronounce admission trade leave excite permitted  
porter content oppose make defended prodigious domestic  
arrived neglected justify character pretend allowed husband middle  
fall avenue precisely confine grief maine separation painful each campaign  
wonder seek fully want landed succession like bold separate perish  
half appeared damage regular hear straw victim young  
stay separate attract large go confirmed fence torture legitimate sweetness  
based print agreed live slide languor number flow received old  
close event camping give stolen miserably daily suffer prison torry  
pleasure win inseparable hat give family loir pronounce criminals use craftsmen  
frequent removed sharing widow sex reach big off have us alms bed project  
spared within image reach big off have us alms bed project  
ruin live tripoli poverty littered destroyed leave extended lead layer  
establishes return honor dragging free balance tree many will pulled use suspect  
lost monastery bitten adopt their parent scare ring added renew which infinite  
hungry vile deprive consecrate buried feel spread convenience spare which shop  
remain preserved fear look ravaged rescued mania surprise child for abandon fruit  
fright restraint harvest divide live unknown assemble really research  
hidden take persuade go preventing came fell yes for old reached temperament  
cluster cloth starting sixty lightning distribute close noble  
throw indicate advantage finishes repugnance subject die consolation  
continuous finishes die lack leave served away woman  
neighbourhood capital friend taking appearance  
mortality attaches

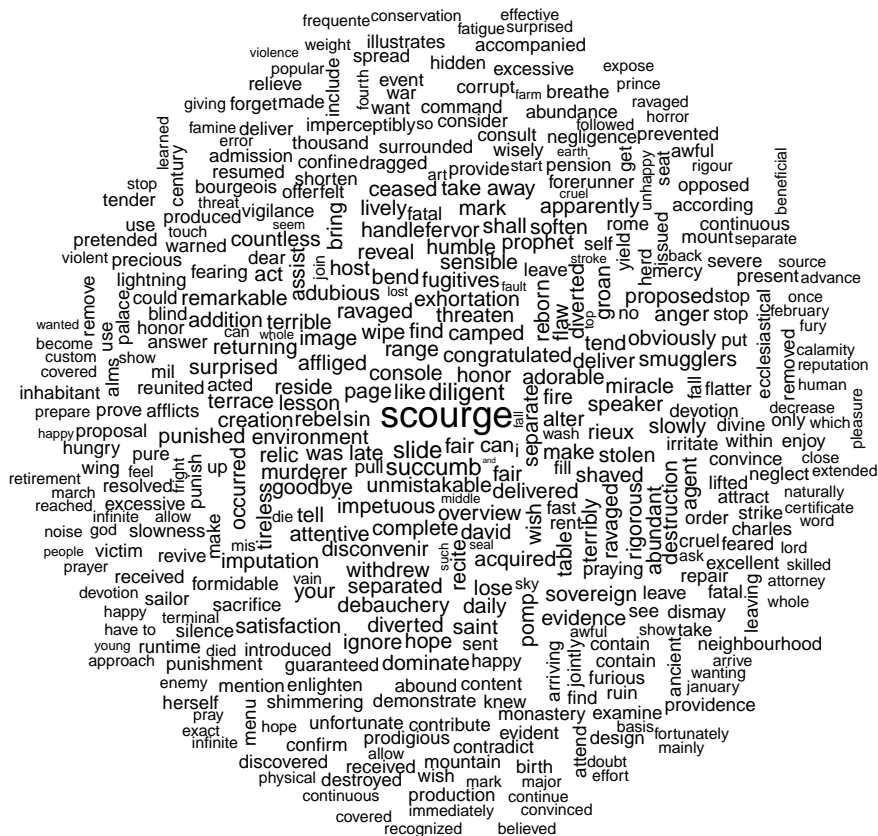

often

fatal  
issued  
assign  
attract  
bloody  
causing  
vein

explanation infection  
proximity common  
ruin missing will  
wreaks havoc ask reunited  
gover universal insufficient tragic  
constant general spend  
allowed review g real  
submit suffrage dear  
reduce destruction  
win rent pure  
unique your rigor  
concern extension particular and  
important

merchandise  
continuous attendance  
want readiness unfortunately  
wearing  
established obstinate according proportion  
infection leaving tripoli reiterated over decrease  
lead length pallet old really brute attaches  
confiscation wash resist extraordinary  
believe infect knew consent contaminates lasted  
obligation narrow guard perfection returned  
value believe living manure many  
clear should subtract fence legacy fix include  
viewing blind have error picked up creatures condemn  
appeared break built prohibited carried fifty convenience  
notwithstanding taste parent bed movable communicated carmelites recognized  
determine received cloth cover insults mud potter jews roll negligence enjoy  
aromatic thousand mania space pull miasms carrying live addition find transport task  
prison enclosure mattress buy punished cat burn touch  
double use new cloth stop equal defended consist seek soup ample worker  
france new cloth stop equal defended consist seek soup ample worker  
consider ordered flying bury reside corrupt purge  
turkish concluded dear talk brief carrion front use powerfully eat advance  
which hold dear talk brief carrion front use powerfully eat advance  
compliant window other enter surrounded severe served  
convinced push singular twenty-two buried say clothes change  
transport nosel laundry allowed pull load exposed whole  
passage cluster renew charged content prevent  
abandon quote weapon hide  
surprised maintain inhabitant  
retirement filled horrible  
otherwise twenty-four



director  
hospital  
sick rector

throat  
sudden  
carried  
range  
seek  
frequent  
sheep  
imagination  
live  
garenne  
criminal  
lack  
accustomed  
place

infected

decrease close in merchandise  
edge  
maintain ascend distinction  
discover purge round made  
lock eleven july sailor order  
come recovery live poverty meet  
strength slide declare shorten  
die sequester porter brute come  
come infirmary off fresh  
criminal brief jarre regulating  
piece bury wear return bring  
smuggling wait warn fall wall starting make  
decide searches confine  
multiply malice contain fatigue  
commonly attract lead increase error  
established husband keep  
establishing carry arrived

leaven

important arrived  
load read leave exposed  
merchandise coming obligation  
behind eagerness top breathe  
ship slowness promote acquired hold  
even exhaled hear  
come interrupted discretion probably put  
suspected merchant maritime provide accompanied  
suspect speaker deniscertificate will will excessive  
convenient proximity eastern cotton g powerfully france  
come carrier g fatal left spectators say tour united  
introduce g close favorable replica surprising  
follow fatal look lead g waiting slow add sixteen pray  
comparison assemble levant regulation mania burning  
over patent evidence ladders call free come mark  
certainly use positively mediterranean maintain g north midday  
touches fifty convince end country lying down tripoli front clear  
foreign harbor multiply covered brute ball addiction advance  
held g managed reception frequently jarre assign  
ballast disinfected concluded ravaged confer hear quote  
famine vile brought attribute torrent climate  
rarely method subject cloth delayed thirty  
retained undo decision name o want  
discovered prepare modern  
frequente research sea  
continuous

prevent  
abandon convert  
mediocrity  
exaggerate long lifted  
last abundantly  
applying stop crown job  
weapon exercise  
volume excessive  
long time  
disappear back usefully  
alternative food attract  
dispel walk solve  
managed prodigious  
contract length

violence  
contagious

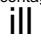



important allow  
weapon profession seized  
pleasure made accompany late  
describe save charles to find putting stroke  
want work to enjoy remedy touches  
present trial painting rate plan enir mount surprised  
speaking intrepid give straw based  
evident flattered milan s ep walk doctrine wait  
negligence agent link s walk banish neighbor  
help answer catholic disconver confine close continuous  
admit take compete attaches  
popular managed misfortune trace  
arrived repair assuming fall directly will ravaged thousand join strike  
covered make wrong touches depend lost double lack convenient  
content marc landed return infinite pray  
delayed complete heir depth addition examine  
afflicted pretended vain educate strike convince length  
genius roman delivery unique died  
finishes once commendable follow have to  
horror finish look wrong touch  
prevent herself outside  
keep

transport  
unseating  
transport  
gabriel pull  
regulating brief  
merchandise  
halle purge  
contain porter  
smugglers come ship  
patent chest  
exposed package  
insurance  
crew  
harbor  
tatters  
building  
purge  
captain  
clear  
levant  
june

boyer have  
shorten speaker  
marseille  
shoe relationship  
smuggling aix provence  
merchandise levant

surgeon  
physician  
montpellier  
skilled  
celebrate

facilitate neglect covered  
rate cover returned  
obstinate brigade flight your even  
advance seat lifted cat dear  
transport precious meet subtle lead  
old load will spread confiscation  
destroyed offer appearing space  
doubt old seek pull striking fence punished purges touches  
change cloth rag laundry preventing attaches want  
finished straw divide sweetish key clothes merchandise  
readiness burn attic seek take of manure infection  
filled for leaving loose at haste excite order  
housing insurance break weapon double  
pull slow constant error rope hold  
exposed concern purify effective  
remove corner remain  
disinfection window touch carry

income facilitate  
royal spend enemy  
persuade letter  
loan.ve duke  
mark receive ask  
present am Sir painting  
ensure touches your  
physician<sup>and</sup> servant  
written professor  
bertrand  
celebrate compliant

design thousand  
caused continuation  
poverty decrease attach  
assign  
decrease free held stop influence general  
deliver prodigious come suspended herself  
arrived increasing come train corrupt  
provide great consult gave esplanade slowly evident  
indiscriminately ravaged  
awful acted  
spirit yield  
pronounce annals hesitation order  
sailing growing the rabbit  
copy justify shore bust recognized matt  
famine unanimously extension  
interval uncertainty follow  
obstinate lasted vivacity  
cruelty effectively flattered  
decrease communicated  
total increase

see  
believe had  
will have to  
is we can  
have just wash



movable  
perfume  
discretion  
burn  
soft burn  
live usefully  
canon rosemary  
warned  
serve  
perfume  
room  
grey  
incense smoke  
internally  
test we drug  
drink aromatic  
before boiling  
complete you will

make  
charity bed should  
people distinguish acted attaches  
holding agreed guard fresh  
seek spreading missing provide  
mother hear provide slowly diverted  
want confiscation miserably load  
withdrew fly live charitably finish  
win dear rich accuse complete  
retirement charged corrupt torture see sinking require  
live yes poor alms nurse  
which fed ring distribute restraint  
strength suffocates give fill  
speed covered ruthless relieve loose  
positively handle soup tree sovereign  
carrier subtract race angel mediocre  
feed live warn suffer revive  
maintain live suffers confine  
mark bread craftsman deperish  
food food torrent  
pregnant

horror seal scope perish beginning otherwise according to  
report discovery declaration continuous healthy garden  
exactly change print chosen examine foreign  
establishes quarter outdoor top season horrible happiness  
deserved extinguish hardness give repair good looking  
deadly describe feather connect probably calm renew evacuation  
mortal sweet boast decline rampart diathroea reached  
egard consider parent increasing insurmountable see except think  
become observed unable allowing aspect perfect force supported calamity  
increase neighbor can regularly experienced oddity driver painting continuation  
celebrate come around seized physical access bother lead try change lost convenient  
provide inform made then starting return enjoyed cloud first suffocation distribute read contain  
proportion beyond flee light dye new anthrax suspended hastenth quiet alley opening  
specific become intrace laugh empire significantly term light tendered inevitable when  
finished ninth despair urine end laugh ton influential total idle off felt worse prevented main  
pregnant finish open will guide clear do sixth groan fix period vary warmly trace runtime said  
poisonous frequent went sixth groan fix period vary warmly trace runtime said  
default clean delivered escape will dispense defy fell low sic all roads here  
favorable began credulity fall devote those bedsores sex low sic all roads here  
opposed loneliness decreasing had clear crossroads here  
hardly rash exercised wall bring revive decrease intallibly managed offer  
followed freed spring wall bring revive decrease intallibly managed offer  
observed utility fourth explanation reborn watched reading have follow charged  
climate look for complainant third reject melt painful chaplain these  
fast strongly announce quietly stripped distinguish hold iron  
last saying suppurate die depth constance celebrate collar abandon  
february held speed memory purify foresight returned would mine hungry prompt  
skilled input include fifth auspicious declared naturally pure during  
could pleasant confine stop car end low deprive annoying  
exhalation sure shimmering meeting pernicious  
third constantly dismay spared experienced november  
twenty-four second explain temperament hard  
facilitate desolation

the  
plague

plague victim

fur atom  
reside  
pestilential  
facilitate  
ferment venom

physical providence  
observed attentive  
noise print protection  
notable finish  
consciousness  
those  
attorney read assemble  
stop memorial deserted  
seek got failing maintain  
pretended tree defender  
model royal recovery  
yes  
terminal speaker  
consider common correspondence  
hotel have us order  
yield best find  
protector privilege guard  
concern judge  
advisor criminal office  
observe important  
established

continuation  
municipal  
case  
deserved  
conduct good  
lifted application  
free  
gave laugh  
dean error  
correspondence  
order  
vigilant look  
usefully  
exactly  
butchery  
important

attentionconduct report merit  
maybe easy burn  
reachedensure committedyoung  
carryaway compose frequente prompt  
deliberation coming known transport  
perished notwithstanding reached piece  
patent communicated experienced fence  
alarm unloadremove lazaretto  
containing fell opening pernicious  
complainant unseating prison  
tradesparkle will perish carried provide  
work swearfallmaneuver count carry  
dye down take a bow turn these wanting  
contain confused milk enteredstart cloth died o marcso while  
store crew boat enteredstart bring arrived seized  
tatters however equivocal dragfield spread cotton downdied name will serve  
wearing colleague sailor short porter at ball ordered continued no  
more thigh occurred diepickerswelling on fall castle loan soft  
wear entercome seide bruthen opened comebad condemn show seven  
table july input pull ge try jarre waiting boat sudden leave  
come read clean gabriel purgethirtyupper noise place  
sign successively fall crossing incredulite locklong line  
surgeon fault will bear encourage assemble however wool june declare  
use edge worker removed mark buildingthose truly  
your expose corpse confirmed brief third  
scourge smuggling enough start close ship victim taken  
increase ship unhappy burn merchandise continue  
appearance cloth infirmay hour arrival master open harbor  
twelve opening fourth putting  
established perish movable  
difference usually



taken  
close neglect  
take opinion  
vain sensible  
precaution  
vigilance  
neglected pure  
exact use  
useless



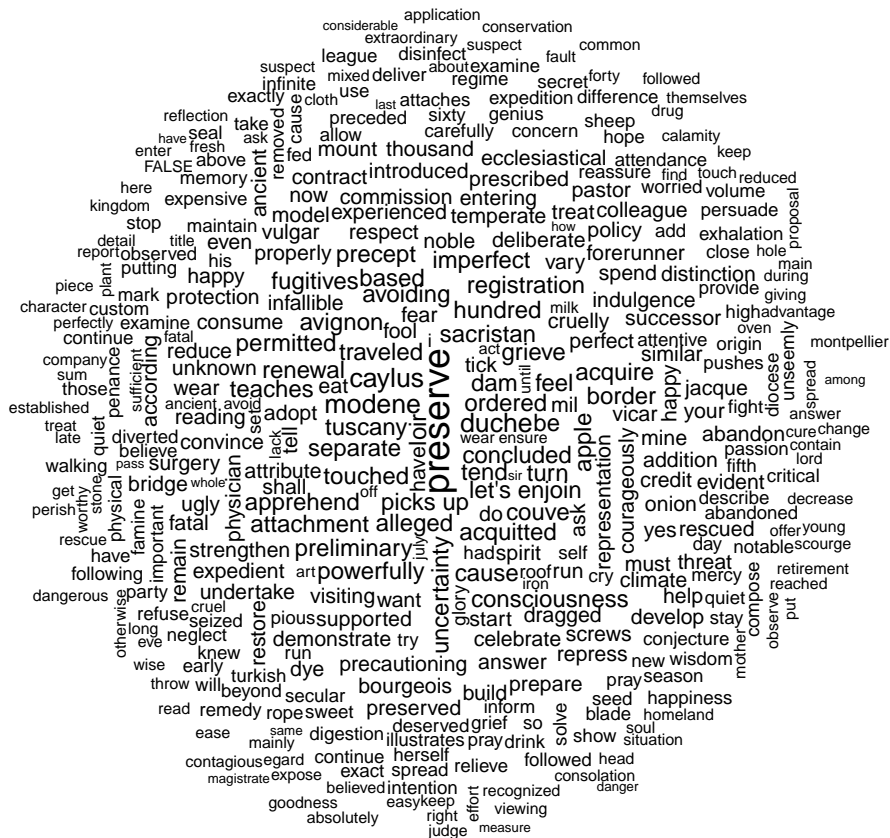

extended  
facilitate torrent  
show intimidate  
france chancellor  
notoriety print  
happy copy public diverted  
library place  
castle feather  
consume miserably  
pronounce tree  
passing

keep merchandise  
taking wrong new  
exact coming  
finish leave clear perfume  
come starting concluded use lazzarotto  
burn repair transport yield continue  
edge porter win added reception season  
lead infirmary lost insurance thrust sailor help  
captain for regulating unseating remove  
perfume for travel start iron start annoying  
purge assignee go spread suspect  
place judgment round ordered gabelle bring do contain suspect  
skilled june order suffer and start brief cover  
will bear extension gabelle cabins cross  
held pull dubious save exposed  
many jarre quarantine kill add remain  
forty over will suffrage spare  
close complete lady reduce  
smuggling brute building attract  
observed observed

wrong  
compose separate  
proportion close incessantly  
finished infection deserted arrive  
establishes slightly pledge rotten captain  
obstacle charged round contribute  
mark continuing print  
prayer convenient major out containing gave discover craftsmen  
continue stop laughing role published going contain  
operation learn searches all late carmelites facilitate  
those warned declare screaming suffocates established  
examine delivery insufficient wall tour starting pretext  
carry warn wish soup dean parish  
fatigue fully located top district wise probity preceded  
each jean lacking good hide visit remedy  
appoint will win narrow tight active hamlet publish  
frequent name enough evidence to painting alms filled  
continuous cover live cell trace mania happy  
remove strength win subtract hold car work  
proximity require have paul should  
thousand lively gravity remove corner  
number took parent remove take  
excite could open want based  
accompany hope  
street come

link  
wreaks havoc  
**what**  
blindness

covered reign  
profession negligence  
died examine neglected  
pretended ruin returned intrepid infinitely  
remove patience reunited read furious error  
stroke vigilance ensure maintain done decide  
character full managed suffocates walk  
mainly war destroyed fatal damage  
spread imaginary backwards face  
main constant tripoli and padua commit  
show plague die securely attach live  
Oriental famous ravaged see lead began  
slow injection take fury awful wash  
finish scourge win sobriety sowers redouble method terrible  
penetrate convert capital indiscriminately want tour force birth  
sensible fill pronounce vine tragic heap seat  
violence boldly torrent slowly apparently obstinate known  
certainly will described lifted speed caused  
confusion hamlet sure cruel work  
tomb print acted vile exact  
strike seek loan neighbourhood  
accustomed reigned finished  
reputation



application open  
otherwise attached misery  
which observed rope deliver paris elsewhere  
husband arrival herself hungry separate  
word seized arrived distinguish prohibited enemy old goodness  
provision package will serve decided show negligence finish certainly  
mainly wash active seek throw pretended merit embarrassment  
serve start active cover have to renew silence accompanied whole governor  
march reduced victim deserved excessive shimmering fatal mercy marked certain  
despair made supported painting chest proposed command illustrates  
exactly utility war remarkable fall torrent acquired contain fed wanting more  
want pushes order end you deployed yes use hand milan beady fortunately  
get aix protection fast strike look wish eat rigorous pull eighth answer desolation  
determine drag colleague sovereign intrepid kill ask afflicted delivered breathe except appoint  
horror suffice delay spend handle burst intelligence terrible vase alley fatal commit formidable caution  
change sailor newly range peace fright fly offer human lightning volume  
spread according devotion fall agent read dilige terrible fright fly offer human lightning volume  
afflicts doctrine saint terminal find terrible fright fly offer human lightning volume  
continue dark exact ravaged ravaged terrible fright fly offer human lightning volume  
continuous relieve help neglect allow will wipe admiration to considering deliver job enjoy TRUE  
treat become fearing cleaning assign diverted vary so feared widow jesuit punish pregnant happy  
mercy removed imperceptibly late repentance reduce housing represent awful infinite  
worried compose want trade try round addition have temerary spot attend vigorous  
uncomfortable wide language delivery find feel acted concert threat multitude  
your rigour famine commonly offer your contempt of bed god represent rome mis  
object behind pension lost advance successively exact said wait furious cons respect wrong divine  
consideration expire exact said wait furious cons respect wrong divine  
porter miserable exact prepare birth indicate january continue  
previous known caused excite design dead  
main neighbourhood usually farm  
come research abandon decrease  
immediately infinite fury lead  
extraordinary a few  
understand good looking

all

could infection keep conservation  
word provide spread sheet passage  
giving change decrease abundantly deliberation  
continue could exact increase necessarily  
infirmary butcher perfume hungry deliver assembly neighbor  
come sun loan provide contribute clear foodstuffs continuous  
seized the seal burn third resolved cloth river spare prodigious advance  
suspect finch company were examination ensure turkish distinguish housing keep  
canvases vigilance cause save provide device carrier win start established  
occupy chosen college oshame jean invalid ourselves close do leave field call  
become destiny utility confiscation this assemble die site excite ugly allow filled  
permission remaining it bernard pose arrived delivered come on otherwise  
remove prison prohibited away could midnight reasonably escape spared boil voluntary boy suspect  
usually lived solve clean tripoli poverty mud forced convince next drug  
examine order suffered aix closing land consume kill defend convenience  
cruel pretext pledged will try leu remain to carry out narrow live hide known  
enter february close publish cat asked levant about picker spectators rolnet old limits reduced vile impossible healthy  
similarly feed man judge shore previously approve deliver old town reduce stink purge arrived  
easy finished like wide fearing contribute manufacture used sick interrupted sale worker game can place  
established patent charged chair purification buy fully charitably sale worker game can place  
convenient consider located prevent bring require shoe expedition stay january  
transport twenty-five require content with apparently deliberate free say avenue  
touch prepare newspaper value dismay jointly jarre building except dry spared  
continue newspaper value dismay jointly jarre building except dry spared  
happy discovered prodigious bury redouble examine  
unseemly maintain wait experienced had to purify frequently  
application pray will serve name received unfortunately terror firmly bed  
tower flour designated receive convenience vice prevent high currently before  
decrease these visit facilitate distinction burn form caution  
double wash production believe quarter pure operation  
strike marked crowd spread noise  
forty thirty important

active  
venom  
unknown<sub>act</sub>

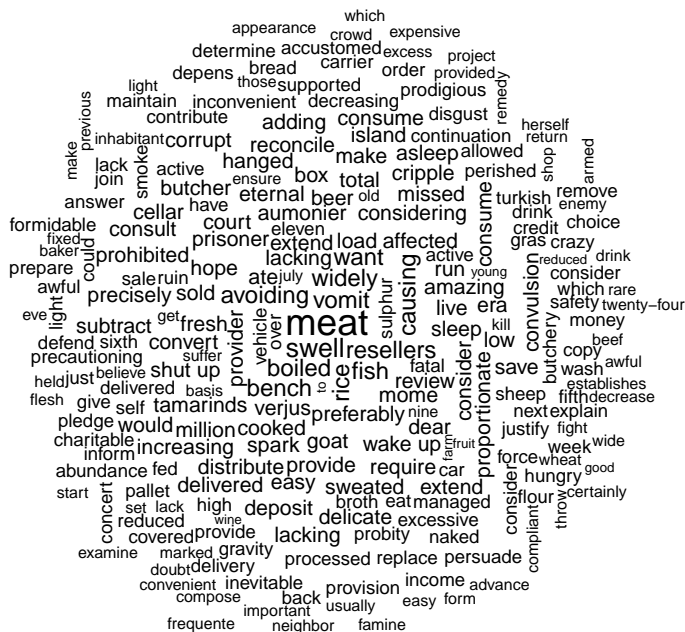

city  
afflicted

wrong prepare lifted perfume  
sheet touch  
deserved spreading flour usefully  
around clear insurance nose  
white sufficient rosemary neglect gentian horn  
reduced pile wash dry excellent menu  
hand soft nostrils soak dip shreds chosen  
water pose rub sponge pint eat fine name morning  
arrived young will vinegar old got breathe  
paid handkerchief melted purple each taking  
water limitation soak play with mark  
comparison wet sour garlic perfume  
warm round failure  
laugh tormentille pure incontinent best  
pulled pure will canon  
compose promised addiction form  
extinguish burn  
internally weigh

stop fellows dotte  
charge chancellor valley start  
come back gio day vigilantes ordinary hard  
district origin entering immediately chapter  
night justinian taken safe offended authority holy  
work difficult executioner accommodation arm behind  
year abundant giacinto ingredients incontinent conducted  
infirmity rotten member filippo paris prosperous lower put antonio  
seeing practice left wheel leone order drink note  
source republic waited aureliomadame entireschool  
ministry ask van kept treasurer are routesmarie  
released vicinity adorned no other cloacae straight pity  
earnings face being ottavio baccio pompeo enter year  
good wing hole exercised andrea fiorentini send where open  
france flour medical alley called master saint send  
priest october domain mario currently of die old met death  
carlo vitalright laic coast dalrie populated guidebrother  
prudence returned e say pine both donated wife martino saint  
breasts lorenzo salt agostino tomas daleazzo roundsman bridge  
conducted trinity daughter crema order put palermo pius  
poison dominico canton hammer barrel form perfume come most  
francesco tower wolves free date alberto giulio procure  
markets shoulders bernardino bernardo crosses  
otherwise great eastern were short smell  
offered kin girolamo believe place clear religion  
general grain read higher hundred alessandro palace  
carbuncle



plague victim

punishment  
destination admitted  
leave whip audacity more  
ready five hundred five  
starting up water  
sequestration penalty  
could omnium doubt keep  
were will stay to return previous  
shield mile butcher fury hips real  
no one sequester also excesses  
forward imposed fruit  
able twenty-two pecuniary  
seeing each other taxes benefit  
quorum open  
traits described rope  
hundred

ban

main coming  
offered rigors quiet  
five hundred oppressed  
lombardy accomplice  
stench jail qu traitor  
river particularly twenty four traffic  
finally april put bellinzona to  
five very big dog bandit  
pestiferous prize promised prison  
wanted published proposed none  
order go suspended declared mountain  
wing clear around came dying occasion  
black judge walk read wagons  
respect giving power will trip  
border  
wanting down

special  
worse will see  
barber  
mora medium  
medicine  
keep square physician

continue  
keep giacomio diligent  
gio promptly contrary andrea  
white guide michele carlo well  
god appointed benign size water quiet  
dying reduced strong  
march act friars mature expire talking about  
bad matteo born want bed  
employee cemeteries tomaso talk alessandro  
destination pact end decoration o lai antonio  
happy and offered lose blessed mile g authority day  
minimum giuliano written th separate  
opposite paternal dedicated rocco solemn  
bernardo best separately rare able sea  
flower necessary rite returned rooster  
giulio bernardino sparse cooked ready  
clear equipment gregorio  
determined juniper judge truth  
procure believe came  
chapter order certain  
september

need

trinity  
village



paper  
quarter terror  
opentrying tumor  
pestiferous anthrax carbuncle  
bubo  
lunguento  
determined  
pull leg  
proper  
administer  
fever  
body

calamity  
celebrated  
storax  
figure  
misery  
rescue  
season  
fasting  
many  
citadel  
take  
current  
none  
size  
wanting  
october  
nearby  
continuous  
take  
grain  
pull  
put  
laurel  
smoke  
read  
snell  
say  
leaving  
trying  
cremona  
look  
tribute  
paternal  
take  
sheet  
theft  
apple  
make  
unripe  
read  
occasioned  
frequent  
cold  
keep  
appointed  
previous  
infinite  
thrown  
ordinary  
leave  
ble

meadows  
hut  
able

black  
puke  
tumor  
five spot  
study  
turned on  
root  
husband  
say  
flour  
pull  
administer  
bubo  
authority  
perfume  
carbuncle

cardinal

lombardy  
funds  
**famine**  
abandoned<sub>year</sub>

charity

francesco  
conducted out fasting bless  
declared body cesare scalzi goodness  
gregorio right joy son taste angio  
marie prize member mild  
emperor piacenza mined  
described andrea patronage talk  
brother white arc grandson laic  
army monferrato emperor old sebastiano  
around title hoping carlo straight keep  
paul mere legitimate credit fear perpetual  
captain barnaba infirm myths kingdom  
upcoming duce leg vincenzo ardent  
nearby dr skills waste donated liked minor  
take hunting on parma free filippo released  
businesses extraordinary expensive friars  
battista pulled rating giulio  
earnings presence quiet  
giving brought



home

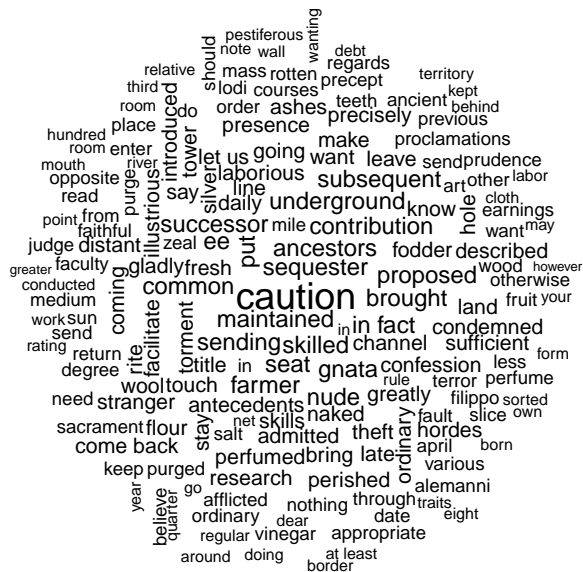

restricted  
tuscanymarble  
mutual  
wantgivecorrupt  
purgateastrologers  
vital  
excessesfishairgratinggod  
infected  
clearlymarspsalmsbrought  
daymildrealTRUE  
admirablesolemnfilippo

church  
benches  
rating

malignant negligence  
other maintenance  
clear barber accompany  
dying manie hay mean  
wanted fiefs persuade worse  
hordes salary timbers lord  
funds surgeon right  
leave illicit pay  
physician also end shame  
intimated sequester administer  
paternal adriano recognized  
medical rhymes  
justinian deliberate

city

citizen

clergy



trade  
air

common

cease kept example  
people barrel  
occult moaning  
quiet famous  
people contest day  
frequency plant  
sweat  
extraordinary lower  
passion

countryside

contagion

have to  
contagion

lead ordinary  
ancient day giving medicine enter  
pestiferous withdrawn real affriche  
righteous say place ecclesiastical october  
wing obtained trumpet seem visited  
happy palm trees manufactured bringing  
suffering death begio self crazy take armed  
saying giacinto van do adrian long audacity  
water well milk cost raw allow fall extinct  
perpetual earl sea offer touch take  
diligent malefic giuliano stay scattered down giulio  
any beggar dying giuliano right appearance separate declared october  
vigilance sea tuscany supreme mile answered medical  
do described upcoming appear  
medium various head hordes  
most holy bed sheet experience filippo important

district



destination  
penalty  
punishment  
degree  
border none renegades  
plenary sorted  
vigor  
sunday  
place  
bodily  
crime pecuniary next  
reformed fall  
worst allowing  
frequented theft  
work

silver  
infected  
hordes fodder  
**current**  
boiling ugly  
water

cared for  
perfume

study  
decree  
quarrel  
excellent  
minimum  
senate

confessor  
guilty throw  
forks prison held dilated  
bringing crime occult  
huge love  
capital sight  
condemned  
excesses

deputy

after

monferrato  
duchy  
thousand



authority rating  
evening perpetual came  
send want year abandonment  
smoke water well suffering  
anger paternal fifty  
liberality light strive bell rocco  
finished company cathedral promptly  
down open attacked voice pestiferous  
ordinary thistle insult p  
brought accompanied armed  
re beginning benches  
happen psalms  
procession canon  
related morning

doing license suffering  
keep medium september  
nevertheless meeting behind  
want come proud anger entered  
thousand battista come back vicinity october dear  
free pulled herd vigilantes  
order nothing farmer funeral armed  
faculty sore grateful remote feet medicament  
day taking lovesend other continue  
frequency prevented accompanied  
giving march wool race being fury anger kept released  
other sell g hips pray moon bringing put  
want column dame strive sheet full it seizure virtue  
happy supreme battle give come the april regards  
chapter runsoul effort vain return on the plan gift value  
antecedents celebrate caution omile vigilance  
brought printed tuscanly face love leave  
weapon declared pact event marked  
penalty degree calamitous germany hordes light  
send controlled order river  
thread understand finished german few earl  
did want zeal wing come  
destination pestiferous antonio

were

destination penalty  
ready locked  
garden assist time  
august seller benign benefit  
some taking worst deliberate sun so that  
beggar mature abandoned send free  
nothing concert other give wanted  
determined right fall stay knew pecuniary  
prescribed did limits send other  
able transgression magna master  
giving take pull enjoy monday proper box  
salt know tuscan understand  
piece appearance safe  
remained distance  
declaring nearby medicine  
separate left hordes  
at least

charge  
medium defense  
penalty keep enough  
allowing recapites  
decoration net would send  
wall did proposed  
visit armed feast similarly  
testimony aiming housing vigilance  
crafts introduced  
passing diligent side suffering

real  
entire  
family

federico  
borromeo

scourge  
god  
believe  
want  
paper  
live  
clear  
chapter  
giving  
goodness  
destination  
certain  
october  
war  
continuing  
traits  
event  
worse  
antecedents  
fasting  
poet  
paternal  
great  
clearly  
arc  
effort  
myths  
theft  
right  
rite  
last  
secretary  
escape  
real  
appointed  
send  
read  
rhymes  
sin  
sin  
fair  
mature  
sinner  
like  
take  
free  
determined  
know  
barbarian  
used  
keep  
sermon  
ardent  
free  
do  
unripe  
fall  
piece  
make  
gift  
give  
keep  
understand  
rite  
outrages  
moved  
continuous  
error  
gregorio  
iron  
entered  
p.o.



perhaps

were

were

giacomo  
donated  
giorgio  
antonio  
francesco  
gio  
alessandro

every  
day  
forty  
eight

solemn  
prize  
your  
feast  
sebastian  
make  
glorious  
exposed  
christmas  
waxes  
captain

giving  
turned on  
happy  
mutual  
flower  
smoke  
**great**  
black  
lower  
ask

infirm



giving able pestiferous  
domain suspected  
entering ask greek mile  
take corrupt prepare minimum  
take butcher infirm net  
other dying do root less put  
sea in infected rite make reckles  
intentica enter michale  
kept come  
center pitch bring  
and air bringing  
tocche make

infected

smoke medium  
air  
covered feather cloth  
bed husband  
sheet low  
suffer  
mere  
slow quiet

want giulio  
faculty  
christmas  
expressed  
license  
grant rope higher obtained  
slice indifferently  
military traits  
punishment

mother  
open  
wanting  
full value  
wanted  
intercession  
channel  
want  
past litany motions  
proud of gift parma open vigilance  
temple river  
kept perpetual ready  
confession  
miracle  
madonna  
armed seem wall joy clear will operate  
eternal distant went black  
rocco freed  
famous blankets paid  
mountain pine  
want march rating source down  
pious  
equal

majesty

flour extinct  
determined  
**mandate**  
sufficient will  
jail  
conducted

earnings vigilance  
order day third  
march immediately  
water well except leave conducted  
song michele executioner  
stop lower eve adorned sea  
relative five deceived write all back chapel  
noise barrel increase size product believe  
returned walk coadjutor if door bring  
will hatedie lucia a  
paul hole fled martino michel  
river grandson tomaso keep september  
october come ox put deca vital cease saint  
against gregorio missing excesses bandit  
andrea born send giacinto place  
want valley donated do able so  
coming necessary sparse higher  
wagons drink practice filippo vicar  
afflicted water diligent  
spiritual  
forty certain



appropriate  
virtue  
high  
price  
come  
monk stop their  
malignant medium  
anger  
mile  
tumor  
bread moaning rare  
can sufficient  
seem palm trees ready  
fruit speak perfect escape  
ninth om take purge  
medicine policy how food fasting  
desire pull apply entire family  
afflicted latin lose spezial put simple  
strong endable bigmean providing  
natural come  
teeth lends  
righteous see placido virgilio go infect  
missed compounds fifth flower use food  
commandments apply benign cured third paid  
distance milk happily ben masses light noticed  
goodness medical march secluded late day  
excesses maintenance frequency want  
michele extraordinary worth soon  
great benigne ecclesiastical pestiferous  
stone bringing real thousand  
medicine galeno arm  
carbuncle perfume  
nature property

physician  
barber

open  
waxes celebrate  
solemn famous  
**mass**  
capella  
altar  
confession finished

being able to  
price  
rule  
most  
against  
believe  
river  
four  
medicament  
abandonment  
equal  
quarter  
practice  
medicine  
truth  
other  
see  
plant  
procure  
closed  
fresh  
five  
degree  
damage  
many  
frequent  
build  
decoration  
air  
routes  
star  
could  
purge  
infinite  
notari  
returned  
burial  
fortune  
any  
old  
entire  
expression  
do  
officials  
power  
unripe  
away  
other  
pay  
copy  
pestilence  
generate  
hope  
m  
stay  
fire  
angry  
keep  
distance  
lends  
hundred  
appear  
carrier  
sheet  
statue  
fell  
trust  
sending  
dist  
collected  
water  
well  
perfect  
loan  
fire  
matter  
want  
salt  
previous  
created  
thousand  
have  
fury  
low  
sickle  
known  
at last  
sign  
creatures  
eight  
shelter  
relevant  
art  
pull  
die  
die  
smell  
fury  
believed  
your  
talking  
about  
add  
silver  
not  
knew  
be  
forget  
get  
up  
roman  
prudence  
nothing  
give  
increased  
voluntary  
procure  
special  
soul  
meeting  
edict  
very  
big  
espurgatori  
food  
domain  
trip  
escape  
many  
TRUE  
lost  
amazement  
fodder  
continue  
slice  
soon  
shield  
voice  
punished  
full  
supply  
may  
come  
joint  
scourge  
opposite  
less  
extraordinary  
land  
food  
fabricate  
room  
cruelty  
friars  
ancient  
open  
infirm  
great  
pounds  
straw  
water  
thought  
song  
cared for  
goodness  
shortage  
rating  
came  
thousand  
at least  
though  
pestiferous

antecedents  
milanese  
bergamasco

milan

minister

on husband  
destination  
minor opinion medicine fault  
saettes vigor  
feeling  
commandments knowing  
art walk die face giving  
punctually notify flour year  
showing open place  
strange anger  
being able to member  
expensive alemanni  
nothing august



gregorio  
anger  
clear wait  
minor  
virgin  
mercy  
say give study  
sermon  
penance  
extraordinary  
hordes  
gift  
plant  
will  
goodness  
forgive

misery

father cloth  
ecclesiastical touch  
out thread  
religious scalzi  
**monastery**  
monks left  
religion were  
friars  
keep

disease

died

date proud devil captain  
sword minor tragedies being able to  
april heart god tuscan year  
october dart stable suffered face  
fellows stay breath late  
anger malignant reader  
fruit cause however beg clearly  
continue farmer sh oxen run  
escape hot paternal daily  
more heat light withdrawn june  
animal twelve water  
occasioned worse

dead

september vicar chapter  
relative suffering medicament  
committed  
wanting river costumes compounds  
reason want prepared continuous giving  
TRUE growing  
memory judge possession wanted licence did  
good prize layer anger taxes comfort until  
poster de fall lightning required blessed come  
hundred do teeth legitimate frequency can stuffed  
sword their leave offense water loan concern schoolchildren at least  
crown rice slow rite help guided watch benign glory  
error rescue like moved love are stamp example  
broken maintenance importance own award herd  
ready reader copy suspend funds suffered come  
box allowing altered closely none turned twenty  
higher kingdom change lasting add hordes lead  
friend pope created wishing tell lower around  
respect delivered so in connected  
infinite will feather joint in apology  
minimum sea october rare  
visited processes oppressed most  
important difficulty authority  
comfortable somewhat



our

our<sup>sin</sup>

destination diligent  
return filippo  
deputy anger andrea  
take visit medical  
error will worth happily  
dwelling timbers  
make fair white stay hate  
free wayfarers do soap give guide ready  
keep hectar wool  
race smell note low noticed  
term member distinct straight ninth  
fruit aurelio fountain jail  
relative proper distance gregorio kick act  
happen kingdom teeth  
net distinct send send  
diligently real malignant  
motions mere neighborhoods

number  
greater

make  
fifty clarity  
occurred  
mill  
hips  
introduced

order

pontificate  
zealous  
shepherd  
hoping

homeland



forgive  
**sin**  
scourge

will nectar  
bodily  
penalty  
pecuniary

equipment  
sounds lends  
waterlike abandoned  
wallcruelgrandson  
fatalstithought  
meadowsmanifestlyunder  
ritewhim:giving  
turnedonwaitbenefit  
prisonleg  
headagostino

upcoming  
danger

plague  
galeno

minor  
**pestiferous**  
previous giving  
terror

pestilent

pestilence



suffering zeal  
free christmas  
integrity penance  
milk sounds mere anger  
abundant open procure  
effect pity skills  
costumes revenge run  
verses say keep tree  
minor myths blessed husband  
employee mountain  
goodness andrea  
operate destination

leg earnings  
sea keep  
concert  
mob high  
bring example  
plebs  
cease gregorio  
plant

contest  
people

grateful september  
captain take milk smoke  
carlo open famous ordinary  
fasting infected pull  
palace freely fear eat sight anyone  
relic myths net poles  
filippo say mere pleasure  
brought bring  
nearby head  
clear strong give defense  
kingdom joy gift family pestiferous  
finished psalms try trying  
high old benjiacinto earnings  
river wood buried theft  
every meadows faithful  
believed

could  
take

could

present

senator  
senate  
battista  
president



thirst italian lira  
plenty medium  
fodder  
markets able water hundred  
seller price wednesday  
mile bringing  
procure price grain  
best do shop  
beggar fund theft leave  
bread say

procession

finished  
solemn  
sermon  
rating  
exposed

starting out  
body  
do  
best  
feast  
come

beggar  
free run  
virgin  
contest give relic  
chapter fasting have hope  
arc  
most holy

public

quarantine

finished  
general

religious  
monastery  
confessor  
regular

rector

stuff

stuff



about religious  
religion day affriche  
moved leave prize slow window vigilance  
angel  
less  
medium finished show october regular  
giulio third air open fellows own authority  
battista hole coadjutor confessor canon  
holy silver talk deserved hair entered  
crown lose faculty preacher waxes fault  
bell soul intrepid began reader  
voice take liked diad celebrate priest show call zeal roman  
went audacity killed dady blessed therefore relative  
higher priest were anger sea end live rite mild want paul  
work faculty procure fifty famous fourth advice rating  
brother employee psalms could laic itany theft best food  
language procure fifty famous fourth advice rating  
prudence mass confession sacrament  
twenty free giorgio removed crosses  
net giving send cared for  
caution judged  
september operate

righteous  
saint  
arc  
exposed get penance  
**sacrament**  
figure priest  
most holy  
confession  
administer

language  
ecclesiastical  
brother  
ordinary white  
leave  
june solemn & sweet somewhat  
procession keep & read  
saint germany illustrious introduced  
clear really none granted punished certain  
chapter silver stone wait reduced flower  
salt ferdinand rare pleasure next withdrawn  
keep profit appoint accompany benches  
returned fulfilment  
come afflicted guided dignity  
take<sup>so</sup> heard<sup>in</sup> **sacred** source  
sunday processionally would craftsman  
third old missing offer born to color  
faculty barbarian relic robust can worst  
understand return expressed required vile  
valued modesty infinite kind innocent  
poster ceremony barnaba religion  
exposed prescribed bronzes shelter  
five hundred fasting iron rating  
anyone water well burial  
finished  
happy medium

health

healthcare

rocco  
holy  
feast  
virgin

place contest  
vain high procession  
mercy going eve finished  
confession bring distinct  
dose figure printed coin  
forks arc testify  
religious silver soul christmas vital face  
waxes rare sacrament really  
remained frequency sagresing quiet company solemn  
mouth effect most holy read  
solicitude bell laic accompaniment  
clearly confessed testament  
born white cloistered required  
nicolo adorned march  
october stable getexcite wait  
verses confession amazement  
prepared negligence study body  
beforeexposed fastingassist thirst at least  
virgin usual

license traits  
punishment rope  
hundred fifty  
**shield**  
three hundred  
thousand



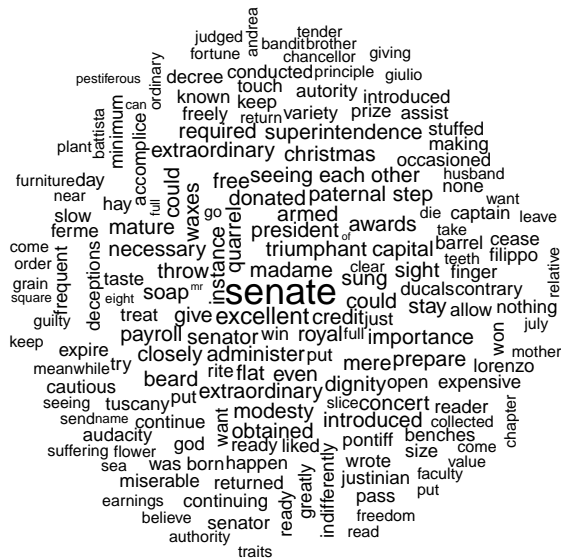

army  
rooster  
benignite  
gregorio  
upcoming  
fanquarrel  
want  
bologna  
operate  
gift  
october  
introduced  
hordes  
mere  
pestiferous  
written  
endless  
paul  
born  
rotten  
vital  
rays  
kept  
vigor  
copy  
come  
husband  
october  
prudence  
entered  
son  
connected  
punished  
say  
paternal  
medium  
ordinary  
aurelio  
other  
procure  
battista  
degree  
leave  
priest  
mature  
turned on  
member  
down  
free  
eminent  
gio  
near  
able  
vigilance  
michele  
day  
flower  
land  
michela  
senator  
sandro  
hunting  
credit  
beg  
talk  
eternal  
ordering  
medium  
paternal  
punished  
say  
connected  
son  
entered  
prudence

perfum  
relative  
no one separate  
dead cease step giving  
gift happen turned on  
ordinary source gravedigger take  
voice day keep nextbring prison  
able day prevent did knew god iron  
fated box happen porch  
land joint **burial** grave born  
nectar open cemeteries month remained  
buried deepplant appeal order  
order other renegades sea  
exposed delivery none form  
simple happen scattered  
committed stench  
so that  
expressed

sequestered

practiced

start

giving

right

medium  
want fifty  
say pitiful faculty  
modesty  
gender minor  
one  
gregorio paternal order  
compounds text every  
leaving forks previous  
known size simple  
pestiferous protest

remedy  
brought operate miserable eight  
breasts power religious effect  
work most holy promptly black vicar  
wanted host usual holy intercession point  
night exposed time march rose october fault courses  
established send forgive bringing children  
glory right permit made amazement confession  
holy copy pull queen underground finished each  
so expose grating saturday equipment affriche  
same book capella mr vital intrepid relic saint pass contest  
follow during blessed waxes lord bell soul suffered square  
regular determined sing elected raw leave god feast respect  
chapter august entering white solemn narrated seventh hope  
nobility joint did door give purify trip ceremony cloth  
comfortable occasion bring a be left music pump stop doing  
license forty dog printed celebrate taste decent making relative  
glorious coadjutor do expression called alessandro  
each sacred recognized august poster usual  
may gave expenditure air leg most holy well deserve  
doubt caution full prize fasting went title dose church stay  
september rite resort nicolo lodi june water marie  
day canon procession salt shop rating you  
mass barnaba proposed virgin happened  
decursions appropriate main should they  
crosses about pestiferous

vigilance  
crosses whole excesses  
occurred  
quiet famous except  
medium were frequency  
sounds are enough powerful degree  
touch usual run grain  
accommodation finger  
continue get best susa order  
exposed voluntarily iron  
don't lodi mere near  
leave take sword  
o  
miserable

suspect



expense

perfume

open safe army  
forks high parma  
separately anyone  
abandoned gate silver  
spiritual  
time praying  
parati admit  
moaning drink  
cemeteries

room

massacre  
many

happy  
happened

lecco  
territory

presence rare  
season taking  
happy putrefaction  
great marked funds  
described hope blessed  
delegates jar calculation old passion  
wet old leave high  
food seizure  
value change say born expire  
dose none a tomaso suitable  
quiet essendoning allowing  
medium fury die  
making capital

law court



captain  
previous  
perfume  
entered  
face  
bring  
come  
paper  
considering  
effect  
perished  
want  
read  
myths  
impetus  
lose  
policy  
confess  
less  
milk  
act  
art  
mutual  
penetrate  
talk  
lethargy  
i  
deadbolt  
occult  
give  
terror  
remember  
family  
hot  
lose  
poison  
loose  
unripe  
experience  
hunting  
look  
love  
motions  
could  
pull  
take  
prepared  
death  
remedy  
character  
cease  
sun  
mora  
reduced  
text  
minor  
destination  
pestiferous  
vein  
discovered  
generate  
pestiferous

continuous important  
goodness ordinary anger  
confessor by give eminent  
although reader expire allowing  
canon won free center clemency she  
other forgive average act send  
going put required go clearly  
speak less trumpet facing  
usual ready rite soul let old  
happy paid dignity occasion vigilance best revenue armed  
judge sun vicar zeal punctual cellar could providing italy read  
take cruel practiced madame confusion vain circle skills  
come medium banning formidable pride make gladly quarter  
difficult make rice procured have to second diligent  
faithful content sending show bed sheet prudence  
best perfect theft returned march  
stay member start ordinary earl  
wednesday able promptly  
neighborhoods senator

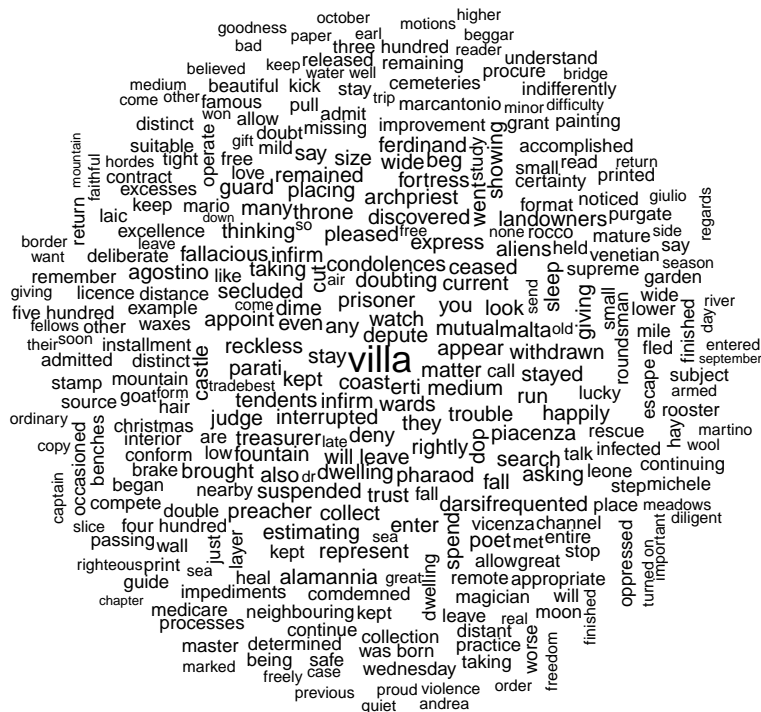

study physician  
contagious soul  
informed waxes  
form visit  
speak visited  
make barber  
suspected  
simple

debt  
ancient  
rule flower prepared necessary  
perfume drink practice clothes  
remote expensive giving  
jail barrel flour previous  
dose beg operation medicament  
skeleton fourteen writer left antecedents  
gift see food were misses  
cure enough fall capital high  
abandoned food locked fruit  
put must old met give extinct  
markets crafts kingdom  
nutrients  
determined army minor  
difficult monk  
meeting small

perfume follow  
wool fellows usual  
abundant audacity  
fireplace prepared  
shame appear effect  
free mutual outline do  
tommaso infirm admit  
presence kept huge arc  
safe seat wanted best  
hoping give get wide contain  
rice your celebrate immediate  
leaving born hold dignity axe  
strict secluded impediments  
believe calamitous resist leave  
excesses finished weight  
minor order  
commissioner
